# Supplementary material for: Bottom-up synthesis and structures of π-lengthened tubular macrocycles
Source: Royal Society of Chemistry journal article supplement (doi:10.1039/c3sc50645b), 2013-01-01
Supplement: c3sc50645b.pdf [file c3sc50645b.pdf]

## Electronic Supplementary Information

### Bottom-up synthesis and structures of $\pi$ -lengthened tubular macrocycles

Taisuke Matsuno, Sho Kamata, Shunpei Hitosugi and Hiroyuki Isobe\*

Department of Chemistry and Advanced Institute for Materials Research (WPI-AIMR), Tohoku University, Sendai 980-8578, Japan.

\*e-mail: isobe@m.tohoku.ac.jp

### Table of Contents

|                                                                          |     |
|--------------------------------------------------------------------------|-----|
| General .....                                                            | S1  |
| Materials .....                                                          | S2  |
| Synthesis .....                                                          | S3  |
| Theoretical calculations .....                                           | S13 |
| Atropisomerism of 6,12-hexyl [4]CA <sub>2,8</sub> .....                  | S54 |
| X-ray crystallographic analysis of 6,12-TIPSe [4]CA <sub>2,8</sub> ..... | S56 |

### General

Analytical thin-layer chromatography (TLC) was performed on a glass plate coated with silica gel (230-400 mesh, 0.25 mm thickness) containing a fluorescent indicator (silica gel 60F<sub>254</sub>, Merck). Flash silica gel column chromatography was performed on silica gel 60N (spherical and neutral gel, 40-50  $\mu$ m, Kanto).<sup>1</sup> Gel permeation chromatography (GPC) was performed on Japan Analytical Industry LC-9104 with JAIGEL 1H, 2H and 2.5H polystyrene columns (eluent: chloroform). High pressure liquid chromatography (HPLC) was performed with cholesterylated columns (COSMOSIL<sup>®</sup> Cholester, 4.6  $\phi$   $\times$  250 + 250 + 250 mm for analytical scales and 20 $\phi$   $\times$  250 + 250 mm for preparative scales, Nacalai Tesque). The analysis was performed on a HPLC system at 40 °C in a column oven (JASCO CO-2060PLUS) under the detection with UV-vis (JASCO MD2018PLUS) and CD (JASCO CD-2095) detectors at flow rate of 1.0 mL/min, and the preparative isolation was performed on Japan Analytical Industry LC-908. IR spectra were recorded on Thermo Scientific Nicolet iS10 FT-IR equipped with an attenuated total reflection (ATR; neat), and were reported as wavenumbers ( $\nu$ ) in cm<sup>-1</sup>. Proton (<sup>1</sup>H) and carbon (<sup>13</sup>C) nuclear magnetic resonance (NMR) spectra were recorded on Bruker AVANCE 400 (<sup>1</sup>H: 400 MHz; <sup>13</sup>C: 100 MHz) or JEOL JNM-ECS 400 (<sup>1</sup>H: 400 MHz; <sup>13</sup>C: 100 MHz) spectrometers. Chemical shift values were given in ppm relative to internal CHCl<sub>3</sub> (for <sup>1</sup>H NMR:  $\delta$  7.26), CDCl<sub>3</sub> (for <sup>13</sup>C NMR:  $\delta$  77.16). Time-of-flight (TOF) mass spectra were obtained on a JEOL JMS-T100 instrument using

1. Still, W. C.; Kahn, M.; Mitra, A. *J. Org. Chem.* **1978**, *43*, 2923-2925.

Direct Analysis in Real Time (DART) ionization or a Bruker Daltonics microflex instrument using Matrix Assisted Laser Desorption Ionization (MALDI) with tetracyanoquinodimethane as the matrix (*ca.* 500 weight%). The melting points were determined by Stuart SMP30 instrument and were uncorrected. UV-visible absorption spectra were recorded with JASCO V-670 or V-630BIO spectrophotometer. Circular dichroism (CD) spectra were obtained on JASCO J-820 spectropolarimeter. X-ray diffraction analysis was carried out on a Bruker APEX II CCD diffractometer.

## Materials

Pigment red 168 (4,10-dibromoanthranthone) was obtained from Clariant Japan. Tin(II) chloride dihydrate, *N,N,N',N'*-tetramethylethylenediamine, cesium fluoride, triphenylphosphine, triisopropylsilylacetylene and potassium phosphate were purchased from Wako. Palladium on carbon (10%), [Ir(cod)OMe]<sub>2</sub> and 4,4'-di-*tert*-butyl-2,2'-dipyridyl were purchased from Aldrich. 1-Hexyne, PdCl<sub>2</sub>(dppf)•CH<sub>2</sub>Cl<sub>2</sub> and bis(pinacolato)diboron were purchased from TCI. *o*-Dichlorobenzene and sodium borohydride were purchased from Kanto. Cyclohexane was purchased from Nacalai. PtCl<sub>2</sub>(cod) was synthesized as reported in literature.<sup>2</sup> Anhydrous THF (stabilizer free, Kanto) and toluene (Kanto) was purified by a solvent purification system (GlassContour) equipped with columns of activated alumina and supported copper catalyst (Q-5).<sup>3</sup> Other solvents were purified by distillation and dried over 4-Å molecular sieves. Butyllithium in hexane was purchased from Kanto and titrated before use.

---

2. McDermott, J. X.; White, J. F.; Whitesides, G. M. *J. Am. Chem. Soc.* **1976**, *98*, 6521-6528.

3. Pangborn, A. B.; Giardello, M. A.; Grubbs, R. H.; Rosen, R. K.; Timmers, F. J. *Organometallics* **1996**, *15*, 1518-1520.

## Synthesis

### 4,10-Dibromo-6,12-bis(triisopropylsilylethynyl)anthanthrene (6,12-TIPSe 1)

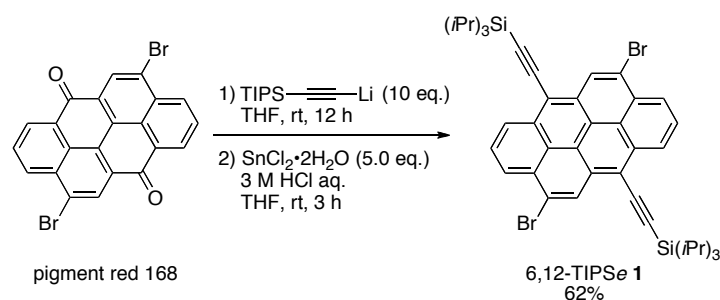

To a solution of triisopropylsilylacetylene (24.0 mL, 108 mmol) in THF (1.0 L) was dropwise added butyllithium (1.59 M in hexane, 67.0 mL, 107 mmol) at 0 °C over 10 min under nitrogen. After stirring the mixture for 1 h at 0 °C, pigment red 168 (5.00 g, 10.8 mmol) was added. After being stirred for 12 h, tin(II) chloride dihydrate (12.2 g, 54.0 mmol) in 3 M aqueous hydrogen chloride (60 mL) was added at ambient temperature and stirred for 3 h. Ice water (ca. 200 mL) was added to quench the reaction, and the insoluble material was filtered off. Organic materials were extracted with chloroform (100 mL  $\times$  5), and the organic layer was washed with brine, dried over magnesium sulfate and concentrated in vacuo. The crude material was washed with ethanol (200 mL) and hexane (300 mL) to afford the title compound in 62% yield (5.28 g, 6.64 mmol) as a dark red solid. Physical data of 6,12-TIPSe 1: mp 239 °C, IR (neat) 677 (s), 725 (s), 753 (m), 840 (m), 879 (s), 995 (w), 1016 (m), 1184 (m), 1463 (w), 2130 (w), 2865 (w), 2941 (w)  $\text{cm}^{-1}$ ;  $^1\text{H}$  NMR (400 MHz,  $\text{CDCl}_3$ )  $\delta$  1.34-1.40 (m, 6H), 1.36 (d,  $J = 4.8$  Hz, 36H), 8.31 (dd,  $J = 8.2, 8.2$  Hz, 2H), 8.74 (d,  $J = 8.2$  Hz, 2H), 9.15 (d,  $J = 8.2$  Hz, 2H), 9.16 (s, 2H);  $^{13}\text{C}$  NMR (100 MHz,  $\text{CDCl}_3$ )  $\delta$  11.8, 19.1, 103.4, 105.7, 117.0, 120.9, 123.0, 125.7, 126.4, 127.1, 127.5, 130.1, 130.6, 130.8, 132.6; HRMS (DART-TOF) calcd for  $\text{C}_{44}\text{H}_{50}\text{Br}_2\text{Si}_2$   $[\text{M}+\text{H}]^+$  793.1896, found 793.1892.

### 6,12-Bis(triisopropylsilylethynyl)anthanthrene (6,12-TIPSe 2)

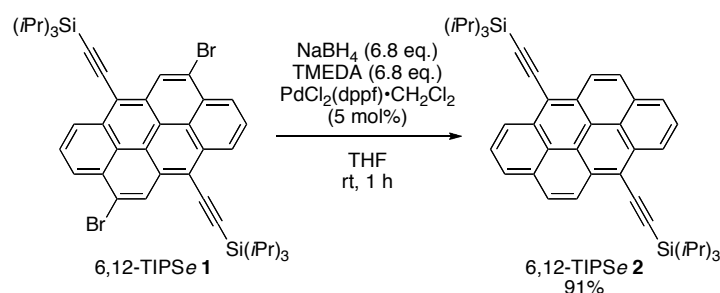

To a mixture of 6,12-TIPSe 1 (1.01 g, 1.27 mmol) and  $\text{Pd}(\text{dppf})\text{Cl}_2 \cdot \text{CH}_2\text{Cl}_2$  (51.8 mg, 63.4  $\mu\text{mol}$ ) in THF (125 mL) was added *N,N,N',N'*-tetramethylethylenediamine (1.29 mL, 8.66 mmol) and sodium borohydride (0.327 g, 8.63 mmol) at ambient temperature under nitrogen. After stirring 1 h, the reaction mixture was filtered to remove insoluble materials, and to the filtrate

was added 1 M aqueous hydrogen chloride (*ca.* 30 mL). Organic materials were extracted by chloroform (100 mL × 4), washed with brine, dried over magnesium sulfate and concentrated in vacuo. The crude material was purified by silica gel (*ca.* 10 g) column chromatography and recrystallization from dichloromethane/methanol to afford the title compound in 91% yield (734 mg, 1.15 mmol) as a red solid. Physical data of 6,12-TIPSe **2**<sup>4</sup>: mp 243 °C (lit.,<sup>4</sup> 244-245 °C); IR (neat) 674 (s), 724 (s), 825 (m), 882 (m), 994 (w), 1016 (w), 1191 (w), 1464 (w), 2139 (w), 2864 (w), 2941 (w) cm<sup>-1</sup>; <sup>1</sup>H NMR (400 MHz, CDCl<sub>3</sub>) δ 1.33-1.42 (m, 6H), 1.35 (d, *J* = 4.8 Hz, 36H), 8.22 (d, *J* = 7.2 Hz, 2H), 8.23 (dd, *J* = 9.2, 9.2 Hz, 2H), 8.30 (d, *J* = 7.2 Hz, 2H), 8.82 (d, *J* = 9.2 Hz, 2H), 9.13 (d, *J* = 9.2, 2H); <sup>13</sup>C NMR (100 MHz, CDCl<sub>3</sub>) δ 11.8, 19.1, 104.2, 104.3, 117.2, 122.1, 122.5, 125.5, 125.8, 126.8, 126.9, 130.0, 131.2, 131.5, 132.9; HRMS (DART-TOF) calcd for C<sub>44</sub>H<sub>52</sub>Si<sub>2</sub>[M+H]<sup>+</sup> 637.3686, found 637.3687.

### 2,8-Bis(4,4,5,5-tetramethyl-1,3,2-dioxaborolan-2-yl)-6,12-bis(triisopropylsilylethynyl)anthanthrene (6,12-TIPSe **3**)

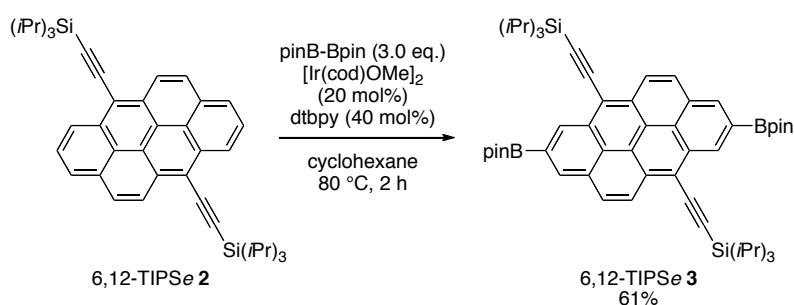

A mixture of 6,12-TIPSe **2** (2.50 g, 3.92 mmol), [Ir(cod)OMe]<sub>2</sub> (520 mg, 0.784 mmol), 4,4'-di-*tert*-butyl-2,2'-bipyridine (dtbpy; 421 mg, 1.57 mmol) and bis(pinacolato)diboron (2.98 g, 11.7 mmol) in cyclohexane (39 mL) was stirred at 80 °C under nitrogen. After 2 h, the solvent was removed in vacuo, and the residue was dissolved in chloroform (*ca.* 50 mL) and passed through a pad of silica gel (*ca.* 50 g) with chloroform (*ca.* 1 L). The crude material was further purified by silica gel column chromatography (eluent: 50% chloroform/hexane) and gel permeation chromatography to afford the title compound in 61% (2.10 g, 2.36 mmol) as an orange solid. Physical data of 6,12-TIPSe **3**: mp 310 °C (decomp.); IR (neat) 671 (s), 835 (m), 969 (m), 1141 (s), 1249 (m), 1307 (m), 1370 (s), 1464 (m), 2132 (w), 2864 (w), 2942 (w); <sup>1</sup>H NMR (400 MHz, CDCl<sub>3</sub>) δ 1.30-1.41 (m, 6H), 1.37 (d, *J* = 4.0 Hz, 36H), 1.48 (s, 24H), 8.21 (d, *J* = 8.8 Hz, 2H), 8.66 (s, 2H), 8.76 (d, *J* = 8.8 Hz, 2H), 9.70 (s, 2H); <sup>13</sup>C NMR (100 MHz, CDCl<sub>3</sub>) δ 11.8, 19.2, 25.2, 84.3, 104.1, 104.6, 117.6, 122.6, 124.0, 126.7, 130.2, 130.7, 130.8, 132.9, 133.5. One quaternary carbon

4. The product was fully characterized by the spectra, but the characterization data were slightly different from the values reported for the same compound from a different synthesis route. Zhang, L.; Walker, B.; Liu, F.; Colella, N. S.; Mannsdeld, S. C. B.; Watkins, J. J.; Nguyen, T.-Q.; Briseno, A. L. *J. Matter. Chem.* **2012**, *22*, 4266-4286.

resonance should be overlapped with other resonance. HRMS (DART-TOF) calcd for  $C_{56}H_{74}B_2O_4Si_2 [M+H]^+$  889.5408, found 889.5430.

### 6,12-TIPSe [4]cyclo-2,8-anthanthrenylene (6,12-TIPSe [4]CA<sub>2,8</sub>)

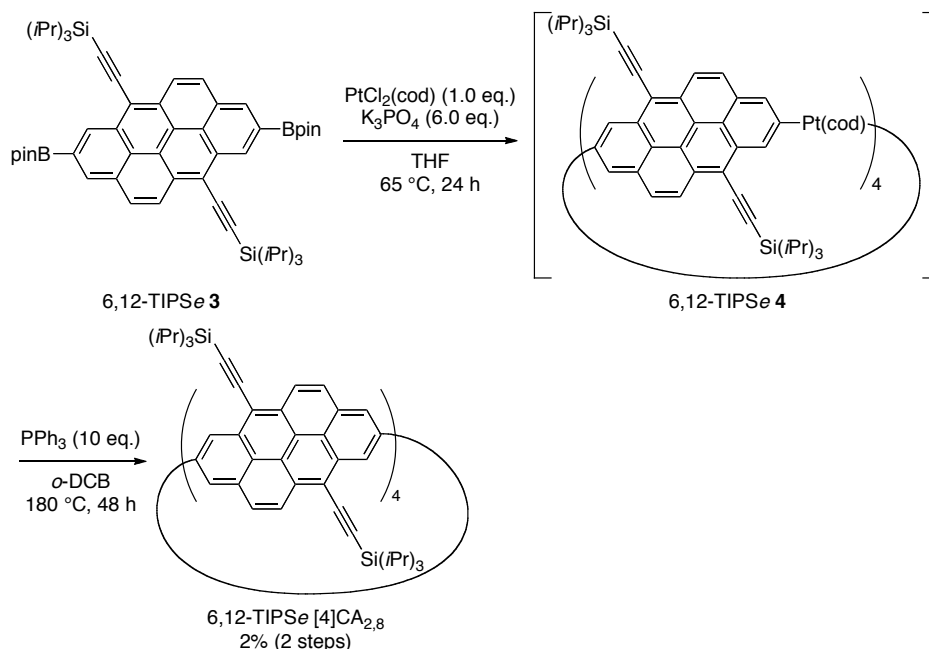

A mixture of 6,12-TIPSe **3** (2.00 g, 2.25 mmol), PtCl<sub>2</sub>(cod) (842 mg, 2.25 mmol) and K<sub>3</sub>PO<sub>4</sub> (2.87 g, 13.5 mmol) in THF (113 mL) was heated at reflux for 24 h. After the addition of water (*ca.* 100 mL), the precipitates were filtered and washed with methanol (*ca.* 20 mL). The solid material containing Pt-intermediate **4** was then dissolved in *o*-dichlorobenzene (190 mL), and triphenylphosphine (5.90 g, 22.5 mmol) was added. The mixture was stirred at ambient temperature for 30 min and at 180 °C for 48 h. After removal of volatile materials in vacuo, the residual materials were purified by silica gel column chromatography (eluent: 20% chloroform/hexane) and gel permeation chromatography to afford the racemic mixture of 6,12-TIPSe (12,8)-[4]CA<sub>2,8</sub> in 2% yield (27.8 mg, 10.9 μmol) as a red solid. Due to highly insoluble nature of the product, we could not obtain the <sup>13</sup>C NMR spectra. Physical data of 6,12-TIPSe (12,8)-[4]CA<sub>2,8</sub>; IR (neat) 676 (s), 703 (s), 881 (s), 995 (m), 1071 (m), 1182 (m), 1462 (m), 1577 (m), 2130 (w), 2864 (m), 2941 (m); <sup>1</sup>H NMR (400 MHz, CDCl<sub>3</sub>) δ 1.30-1.45 (m, 168H), 7.92 (d, *J* = 9.6 Hz, 8H), 8.43 (d, *J* = 9.6 Hz, 8H), 8.68 (d, *J* = 1.2 Hz, 8H), 9.03 (d, *J* = 1.2 Hz, 8H); MS (MALDI-TOF) calcd. for C<sub>176</sub>H<sub>200</sub>Si<sub>8</sub> [M]<sup>+</sup> 2537, found 2537. See Fig. 2 for HPLC analysis.

#### 4,10-Dibromo-6,12-bis(1-hexynyl)anthanthrene (6,12-hexynyl 1)

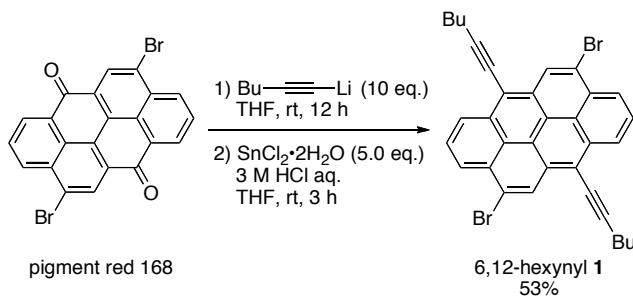

The same synthesis procedure for 6,12-TIPSe 1 was adopted with 1-hexyne to convert pigment red 168 (10.0 g, 21.5 mmol) to 6,12-hexynyl 1 in 53% yield (6.78 g, 11.4 mmol) as an orange solid. Physical data of 6,12-hexynyl 1: mp 214-215 °C; IR (neat) 685 (m), 728 (m), 759 (s), 812 (s), 876 (m), 1351 (m), 1463 (w), 1483 (m), 1579 (m), 1608 (w), 2869 (w), 2930 (m), 2953 (m) cm<sup>-1</sup>; <sup>1</sup>H NMR (400 MHz, CDCl<sub>3</sub>) δ 1.15 (t, *J* = 7.4 Hz, 6H), 1.77 (qt, *J* = 7.4, 7.6 Hz, 4H), 1.94 (tt, *J* = 7.6, 6.8 Hz, 4H), 2.89 (t, *J* = 6.8 Hz, 4H), 8.15 (dd, *J* = 8.4, 7.2 Hz, 2H), 8.58 (d, *J* = 7.2 Hz, 2H), 8.86 (s, 2H), 8.92 (d, *J* = 8.4 Hz, 2H); <sup>13</sup>C NMR (100 MHz, CDCl<sub>3</sub>) δ 14.0, 20.3, 22.6, 31.3, 77.6, 104.1, 117.4, 120.2, 122.8, 125.0, 125.8, 126.8, 126.9, 129.9, 130.3, 130.7, 131.5; HRMS (DART-TOF) calcd for C<sub>34</sub>H<sub>26</sub>Br<sub>2</sub> [M+H]<sup>+</sup> 593.0480, found 593.0473.

#### 6,12-Bis(1-hexynyl)anthanthrene (6,12-hexynyl 2)

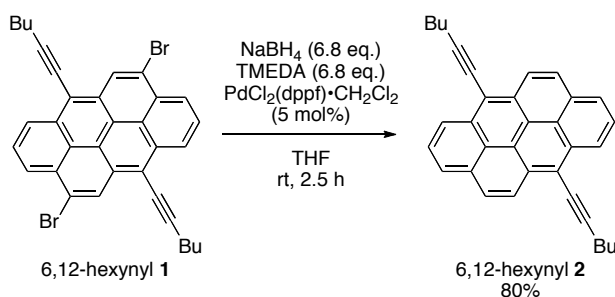

The same synthesis procedure for 6,12-TIPSe 2 was adopted to convert 6,12-hexynyl 1 (6.26 g, 10.5 mmol) to 6,12-hexynyl 2 in 80% yield (3.70 g, 8.47 mmol) as a red solid. Physical data of 6,12-hexynyl 2: mp 149 °C; IR (neat) 731 (s), 757 (m), 795 (m), 812 (s), 830 (s), 1464 (m), 1496 (m), 1582 (m), 1618 (w), 2858 (w), 2929 (m), 2954 (m) cm<sup>-1</sup>; <sup>1</sup>H NMR (400 MHz, CDCl<sub>3</sub>) δ 1.10 (t, *J* = 7.4 Hz, 6H), 1.78 (qt, *J* = 7.4, 7.2 Hz, 4H), 1.91 (tt, *J* = 7.2, 7.0 Hz, 4H), 2.88 (t, *J* = 7.0 Hz, 4H), 8.16 (d, *J* = 9.2 Hz, 2H), 8.20 (dd, *J* = 8.0, 6.4 Hz, 2H), 8.27 (d, *J* = 6.4 Hz, 2H), 8.74 (d, *J* = 9.2 Hz, 2H), 9.06 (d, *J* = 8.0 Hz, 2H); <sup>13</sup>C NMR (100 MHz, CDCl<sub>3</sub>) δ 14.0, 20.2, 22.5, 31.4, 78.1, 103.1, 117.5, 121.8, 122.6, 125.1, 125.5, 126.6, 126.9, 129.4, 131.1, 131.6, 132.1; HRMS (DART-TOF) calcd for C<sub>34</sub>H<sub>28</sub> [M+H]<sup>+</sup> 437.2269, found 437.2263.

### 6,12-Dihexylanthanthrene (6,12-hexyl 2)

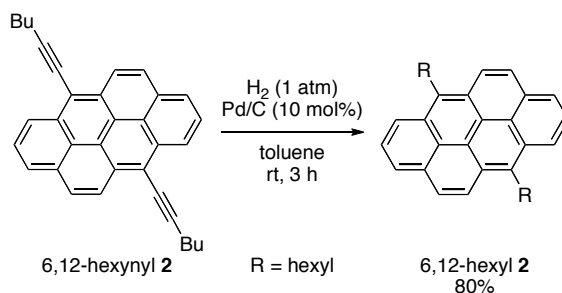

A mixture of 6,12-hexyl-2 (3.70 g, 8.47 mmol) and 10% palladium on carbon (902 mg) in toluene (280 mL) under atmospheric pressure of hydrogen was stirred for 3 h at ambient temperature. Palladium on carbon was filtrated off, and the filtrate was concentrated in vacuo. The crude material was washed with hexane (*ca.* 100 mL) and recrystallized from ethyl acetate to afford the title compound in 80% yield (3.00 g, 6.75 mmol) as a yellow solid. Physical data of 6,12-hexyl-2: mp 163-164 °C; IR (neat) 734 (s), 788 (m), 824 (s), 879 (w), 955 (w), 1114 (w), 1186 (w), 1396 (w), 1467 (m), 1494 (w), 1545 (w), 1585 (w), 1622 (w), 1757 (w), 2851 (w), 2918 (m), 2949 (m)  $\text{cm}^{-1}$ ;  $^1\text{H}$  NMR (400 MHz,  $\text{CDCl}_3$ )  $\delta$  0.94 (t,  $J = 7.2$  Hz, 6H), 1.33-1.54 (m, 8H), 1.70 (tt,  $J = 7.2, 7.2$  Hz, 4H), 2.00 (tt,  $J = 8.0, 7.2$  Hz, 4H), 3.90 (t,  $J = 8.0$  Hz, 4H), 8.12 (d,  $J = 9.6$  Hz, 2H), 8.17 (dd,  $J = 8.0, 8.0$  Hz, 2H), 8.22 (d,  $J = 8.0$  Hz, 2H), 8.48 (d,  $J = 9.6$  Hz, 2H), 8.78 (d,  $J = 8.0$  Hz, 2H);  $^{13}\text{C}$  NMR (100 MHz,  $\text{CDCl}_3$ )  $\delta$  14.3, 22.9, 28.9, 30.3, 31.8, 32.1, 121.9, 122.7, 123.5, 123.8, 124.8, 125.8, 127.8, 128.6, 129.6, 131.8, 133.6; HRMS (DART-TOF) calcd for  $\text{C}_{34}\text{H}_{37}$   $[\text{M}+\text{H}]^+$  445.2895, found 445.2904.

### 6,12-Dihexyl-2,8-bis(4,4,5,5-tetramethyl-1,3,2-dioxaborolan-2-yl)anthanthrene (6,12-hexyl 3)

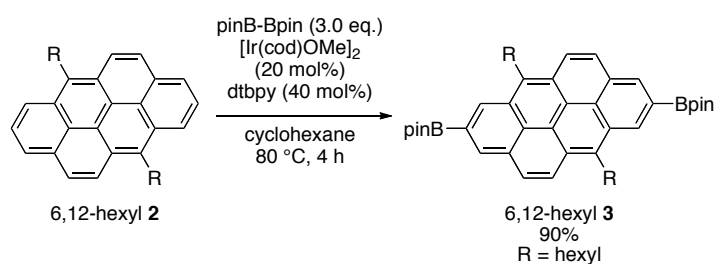

The same diborylation procedure for 6,12-TIPSe 2 was adopted to convert 6,12-hexyl 2 (580 mg, 1.31 mmol) to 6,12-hexyl 3 in 90% yield (817 mg, 1.17 mmol) as a yellow solid. Physical data of 6,12-hexyl 3: mp 215-216 °C; IR (neat) 693 (s), 857 (m), 970 (m), 1144 (s), 1248 (m), 1306 (s), 1334 (m), 1368 (s), 1406 (m), 1464 (m), 2858 (w), 2924 (w), 2948 (w), 2979 (w);  $^1\text{H}$  NMR (400 MHz,  $\text{CDCl}_3$ )  $\delta$  0.96 (t,  $J = 7.2$  Hz, 6H), 1.35-1.55 (m, 8H), 1.50 (s, 24H), 1.71 (tt,  $J = 7.2, 7.2$  Hz, 4H), 2.01 (tt,  $J = 7.2, 7.2$  Hz, 4H), 3.95 (t,  $J = 7.2$  Hz, 4H), 8.13 (d,  $J = 9.6$  Hz, 2H), 8.45 (d,  $J = 9.6$  Hz, 2H), 8.60 (s, 2H), 9.25 (s, 2H);  $^{13}\text{C}$  NMR (100 MHz,  $\text{CDCl}_3$ )  $\delta$  14.3, 22.9, 25.2,



28.6, 30.0, 31.7, 31.9, 84.3, 122.4, 124.7, 125.0, 128.1, 128.8, 129.1, 129.2, 129.9, 131.1, 134.3;  
HRMS (DART-TOF) calcd for  $C_{46}H_{59}B_2O_4$   $[M+H]^+$  697.4614, found 697.4606.

### 6,12-Hexyl [4]cyclo-2,8-anthanthrenylene (6,12-hexyl [4]CA<sub>2,8</sub>)

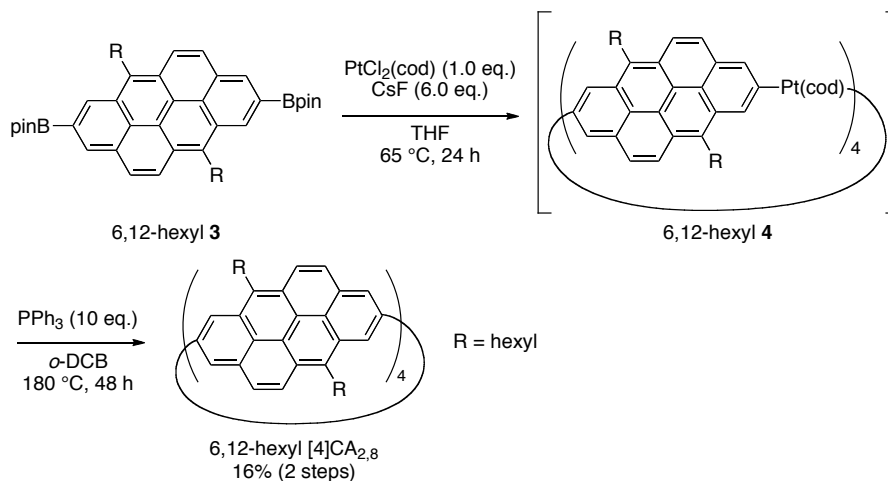

The same macrocyclization procedure for 6,12-hexyl [4]CA<sub>2,8</sub> was adopted to convert 6,12-hexyl **3** (260 mg, 0.373 mmol) to 6,12-hexyl [4]CA<sub>2,8</sub>. As can be seen in the chromatograph for the compounds after silica gel column chromatography (Fig. 2), the compounds at this stage contained a small amount of impurities ( $R_t < 20$  min). The isomers were thus separated by preparative HPLC (eluent: 70%  $\text{CH}_2\text{Cl}_2/\text{MeOH}$ ) to afford the total yield of 16% for 6,12-hexyl [4]CA<sub>2,8</sub>. The yields for each isomer are as follows: 6,12-hexyl (*P*)-(12,8)-[4]CA<sub>2,8</sub> (3.2 mg, 2% yield), 6,12-hexyl (*M*)-(12,8)-[4]CA<sub>2,8</sub> (4.3 mg, 3% yield), 6,12-hexyl (*P*)-(11,9)-[4]CA<sub>2,8</sub> (5.9 mg, 4% yield), 6,12-hexyl (*M*)-(11,9)-[4]CA<sub>2,8</sub> (4.2 mg, 3% yield), 6,12-hexyl (10,10)<sub>AABB</sub>-[4]CA<sub>2,8</sub> (4.8 mg, 3% yield) and 6,12-hexyl (10,10)<sub>ABAB</sub>-[4]CA<sub>2,8</sub> (1.6 mg, 1% yield). Physical data of 6,12-hexyl (*P*)-(12,8)-[4]CA<sub>2,8</sub>: IR (neat) 647 (m), 689 (m), 786 (w), 835 (m), 856 (s), 1457 (w), 1541 (w), 1577 (w), 1615 (w), 2852 (w), 2924 (w), 2952 (w)  $\text{cm}^{-1}$ ;  $^1\text{H}$  NMR (400 MHz,  $\text{CDCl}_3$ )  $\delta$  0.92 (t,  $J = 8.0$  Hz, 24H), 1.30-1.44 (m, 32H), 1.55-1.70 (m, 16H), 1.74-1.83 (m, 16H), 3.62-3.69 (m, 16H), 7.89 (d,  $J = 9.6$  Hz, 8H), 8.12 (d,  $J = 9.6$  Hz, 8H), 8.58 (s, 8H), 8.62 (s, 8H);  $^{13}\text{C}$  NMR (100 MHz,  $\text{CDCl}_3$ )  $\delta$  14.4, 22.9, 29.0, 30.1, 31.6, 31.9, 120.6, 121.3, 122.6, 123.2, 124.6, 127.5, 127.7, 130.4, 132.1, 133.4, 135.4; MS (MALDI-TOF) calcd for  $C_{136}H_{136}$   $[M]^+$  1769, found 1769. Physical data of 6,12-hexyl (*M*)-(12,8)-[4]CA<sub>2,8</sub>: IR (neat) 647 (m), 689 (s), 786 (w), 835 (m), 857 (s), 1457 (w), 1541 (w), 1578 (w), 1614 (w), 2854 (w), 2924 (w), 2952 (w)  $\text{cm}^{-1}$ ;  $^1\text{H}$  NMR (400 MHz,  $\text{CDCl}_3$ )  $\delta$  0.92 (t,  $J = 8.0$  Hz, 24H), 1.30-1.44 (m, 32H), 1.55-1.70 (m, 16H), 1.74-1.83 (m, 16H), 3.62-3.69 (m, 16H), 7.89 (d,  $J = 9.6$  Hz, 8H), 8.12 (d,  $J = 9.6$  Hz, 8H), 8.58 (s, 8H), 8.62 (s, 8H);  $^{13}\text{C}$  NMR (100 MHz,  $\text{CDCl}_3$ )  $\delta$  14.4, 22.9, 29.0, 30.1, 31.6, 32.0, 120.6, 121.3, 122.6, 123.2, 124.6, 127.5, 127.7, 130.4, 132.1, 133.4, 135.4; MS (MALDI-TOF) calcd for  $C_{136}H_{136}$   $[M]^+$  1769,



found 1769. Physical data of 6,12-hexyl (*P*)-(11,9)-[4]CA<sub>2,8</sub>: IR (neat) 644 (w), 690 (s), 786 (w), 836 (w), 856 (s), 1457 (w), 1540 (w), 1576 (w), 1616 (w), 2853 (w), 2923 (w), 2952 (w) cm<sup>-1</sup>; <sup>1</sup>H NMR (400 MHz, CDCl<sub>3</sub>) δ 0.85 (dd, *J* = 7.2, 7.2 Hz, 6H), 0.88 (dd, *J* = 7.2, 7.2 Hz, 6H), 0.94 (dd, *J* = 7.2, 7.2 Hz, 6H), 0.95 (dd, *J* = 7.2, 7.2 Hz, 6H), 1.27-1.45 (m, 32H), 1.55-1.70 (m, 16H), 1.71-1.85 (m, 16H), 3.60-3.75 (m, 16H), 7.83 (d, *J* = 9.6 Hz, 2H), 7.86 (d, *J* = 10 Hz, 2H), 7.88 (d, *J* = 10 Hz, 2H), 7.91 (d, *J* = 10 Hz, 2H), 8.09 (d, *J* = 9.6 Hz, 2H), 8.12 (d, *J* = 9.6 Hz, 2H × 2), 8.15 (d, *J* = 10 Hz, 2H), 8.32 (s, 2H), 8.41 (s, 2H), 8.43 (s, 2H), 8.44 (s, 2H), 8.64 (s, 2H), 8.66 (s, 2H), 8.70 (s, 2H), 8.83 (s, 2H); <sup>13</sup>C NMR (100 MHz, CDCl<sub>3</sub>) δ 14.2, 14.3, 14.3, 14.3, 22.9 (overlapped), 22.9, 22.9, 28.9, 29.0, 29.1, 29.1, 30.1 (overlapped), 30.2, 30.3, 31.6, 31.7, 31.8, 31.9 (overlapped), 32.0 (overlapped), 32.0, 120.9, 121.3, 121.4 (3C overlapped), 121.8 (overlapped), 122.0, 122.5 (overlapped), 122.6, 122.6 (overlapped), 122.7, 122.7, 123.4, 124.6 (4C overlapped), 127.5 (overlapped), 127.5 (overlapped), 127.7, 127.7 (overlapped), 127.8, 130.6, 130.6, 130.6, 130.7, 131.8, 131.9, 132.0, 132.0, 133.3, 133.3, 133.4, 133.5, 135.9, 135.9, 136.1 (overlapped); MS (MALDI-TOF) calcd for C<sub>136</sub>H<sub>136</sub> [M]<sup>+</sup> 1769, found 1769. Physical data of 6,12-hexyl (*M*)-(11,9)-[4]CA<sub>2,8</sub>: IR (neat) 642 (w), 690 (s), 786 (w), 836 (w), 856 (s), 1456 (w), 1540 (w), 1576 (w), 1615 (w), 2854 (w), 2924 (w), 2952 (w) cm<sup>-1</sup>; <sup>1</sup>H NMR (400 MHz, CDCl<sub>3</sub>) δ 0.85 (dd, *J* = 7.2, 7.2 Hz, 6H), 0.88 (dd, *J* = 7.2, 7.2 Hz, 6H), 0.94 (dd, *J* = 7.2, 7.2 Hz, 6H), 0.95 (dd, *J* = 7.2, 7.2 Hz, 6H), 1.27-1.45 (m, 32H), 1.55-1.70 (m, 16H), 1.71-1.85 (m, 16H), 3.60-3.75 (m, 16H), 7.83 (d, *J* = 9.6 Hz, 2H), 7.86 (d, *J* = 10 Hz, 2H), 7.88 (d, *J* = 10 Hz, 2H), 7.91 (d, *J* = 10 Hz, 2H), 8.09 (d, *J* = 9.6 Hz, 2H), 8.12 (d, *J* = 9.6 Hz, 2H × 2), 8.15 (d, *J* = 10 Hz, 2H), 8.32 (s, 2H), 8.41 (s, 2H), 8.43 (s, 2H), 8.44 (s, 2H), 8.64 (s, 2H), 8.66 (s, 2H), 8.71 (s, 2H), 8.83 (s, 2H); <sup>13</sup>C NMR (100 MHz, CDCl<sub>3</sub>) δ 14.2, 14.3, 14.3, 14.4, 22.9 (overlapped), 22.9, 22.9, 28.9, 29.0, 29.1, 29.1, 30.1 (overlapped), 30.2, 30.3, 31.6, 31.7, 31.8, 31.9 (overlapped), 32.0 (overlapped), 32.0, 120.9, 121.3, 121.4 (3C overlapped), 121.8 (overlapped), 122.0, 122.5 (overlapped), 122.6, 122.6 (overlapped), 122.7, 122.7, 123.4, 124.6 (4C overlapped), 127.5 (overlapped), 127.5 (overlapped), 127.7, 127.7 (overlapped), 127.8, 130.6, 130.6, 130.6, 130.7, 131.8, 131.9, 132.0, 132.0, 133.3, 133.3, 133.4, 133.5, 135.9, 135.9, 136.1 (overlapped); MS (MALDI-TOF) calcd for C<sub>136</sub>H<sub>136</sub> [M]<sup>+</sup> 1769, found 1769. Physical data of 6,12-hexyl (10,10)<sub>AABB</sub>-[4]CA<sub>2,8</sub>: IR (neat) 645 (w), 690 (s), 786 (w), 836 (w), 856 (s), 1465 (w), 1540 (w), 1577 (w), 1615 (w), 2854 (w), 2925 (w), 1953 (w) cm<sup>-1</sup>; <sup>1</sup>H NMR (400 MHz, CDCl<sub>3</sub>) δ 0.82 (t, *J* = 7.6 Hz, 12H), 0.96 (t, *J* = 7.2 Hz, 12H), 1.21-1.49 (m, 32H), 1.53-1.70 (m, 16H), 1.73-1.85 (m, 16H), 3.56-3.76 (m, 16H), 7.82 (d, *J* = 9.6 Hz, 4H), 7.90 (d, *J* = 10 Hz, 4H), 8.09 (d, *J* = 10 Hz, 4H), 8.15 (d, *J* = 9.6 Hz, 4H), 8.35 (s, 4H), 8.38 (s, 4H), 8.70 (s, 4H), 8.74 (s, 4H); <sup>13</sup>C NMR (100 MHz, CDCl<sub>3</sub>) δ 14.2, 14.4, 22.9, 22.9, 28.9, 29.1, 30.1, 30.2, 31.6, 31.8, 31.9, 31.9, 121.4, 121.4, 121.6, 122.2, 122.4, 122.5 (overlapped), 123.2, 124.6, 124.6, 127.5 (overlapped), 127.7, 127.7, 130.6, 130.7, 131.8, 131.9, 133.2, 133.4, 136.0, 136.3; MS

(MALDI-TOF) calcd for  $C_{136}H_{136} [M]^+$  1769, found 1769. Physical data of (10,10)<sub>ABAB</sub>-[4]CA<sub>2,8</sub>: IR (neat) 690 (s), 786 (m), 856 (s), 1398 (w), 1456 (m), 1576 (w), 1615 (w), 2854 (m), 2924 (m), 2953 (m)  $cm^{-1}$ ;  $^1H$  NMR (400 MHz,  $CDCl_3$ )  $\delta$  0.88 (t,  $J = 7.2$  Hz, 24H), 1.25-1.42 (m, 32H), 1.54-1.65 (m, 16H), 1.67-1.81 (m, 16H), 3.58-3.74 (m, 16H), 7.87 (d,  $J = 9.6$  Hz, 8H), 8.11 (d,  $J = 9.6$  Hz, 8H), 8.31 (s, 8H), 8.70 (s, 8H);  $^{13}C$  NMR (100 MHz,  $CDCl_3$ )  $\delta$  14.3, 22.9, 29.0, 30.3, 31.8, 32.0, 121.4, 121.8, 122.5, 123.3, 124.6, 127.5, 127.7, 130.7, 131.9, 133.3, 136.6; MS (MALDI-TOF) calcd for  $C_{136}H_{136} [M]^+$  1769, found 1769.

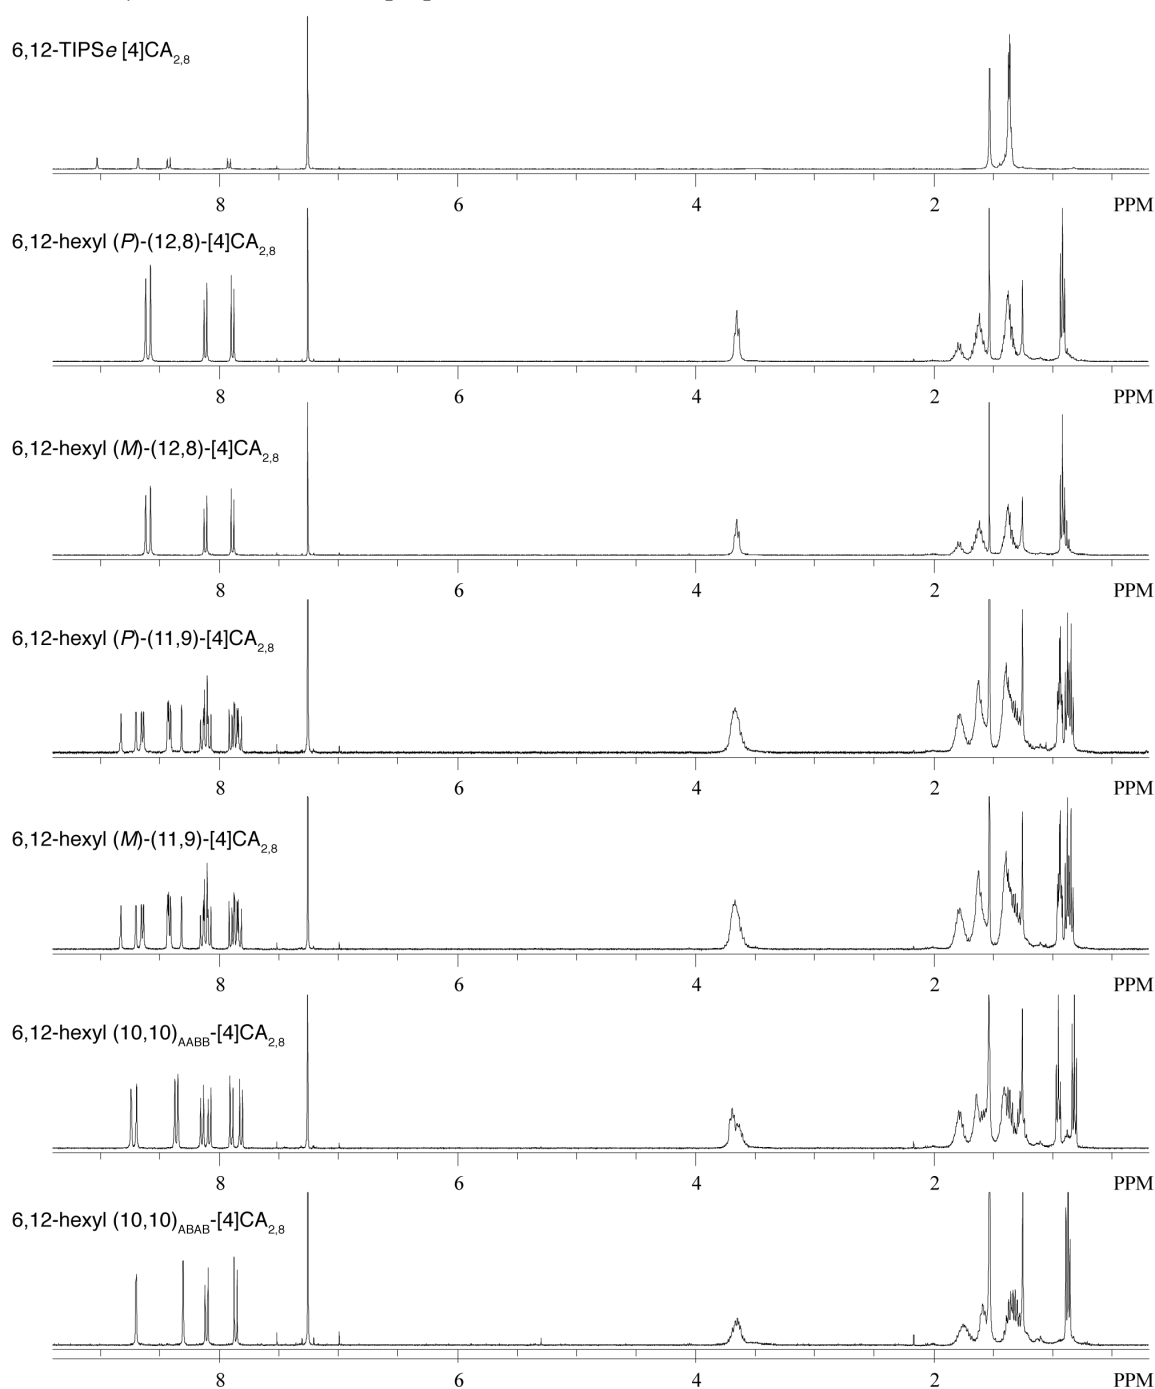

**Fig. S1.**  $^1H$  NMR spectra of [4]CA<sub>2,8</sub> in  $CDCl_3$ . Enlarged views for aromatic region are shown in Fig. 2.

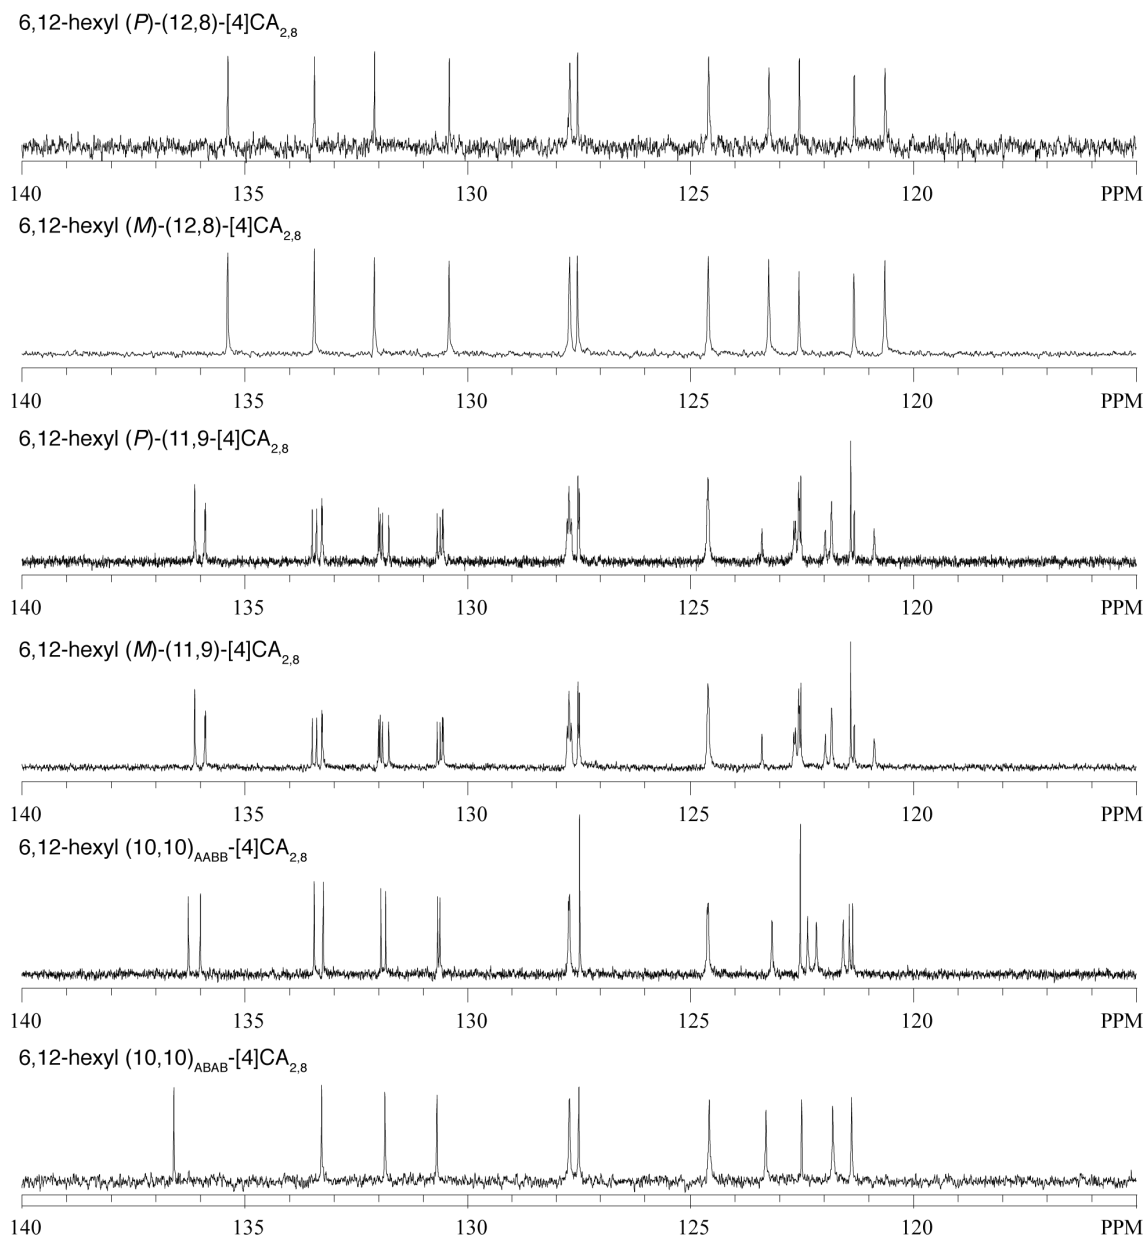

**Fig. S2.** Aromatic region of  $^{13}\text{C}$  NMR spectra of [4]CA<sub>2,8</sub> in CDCl<sub>3</sub>.

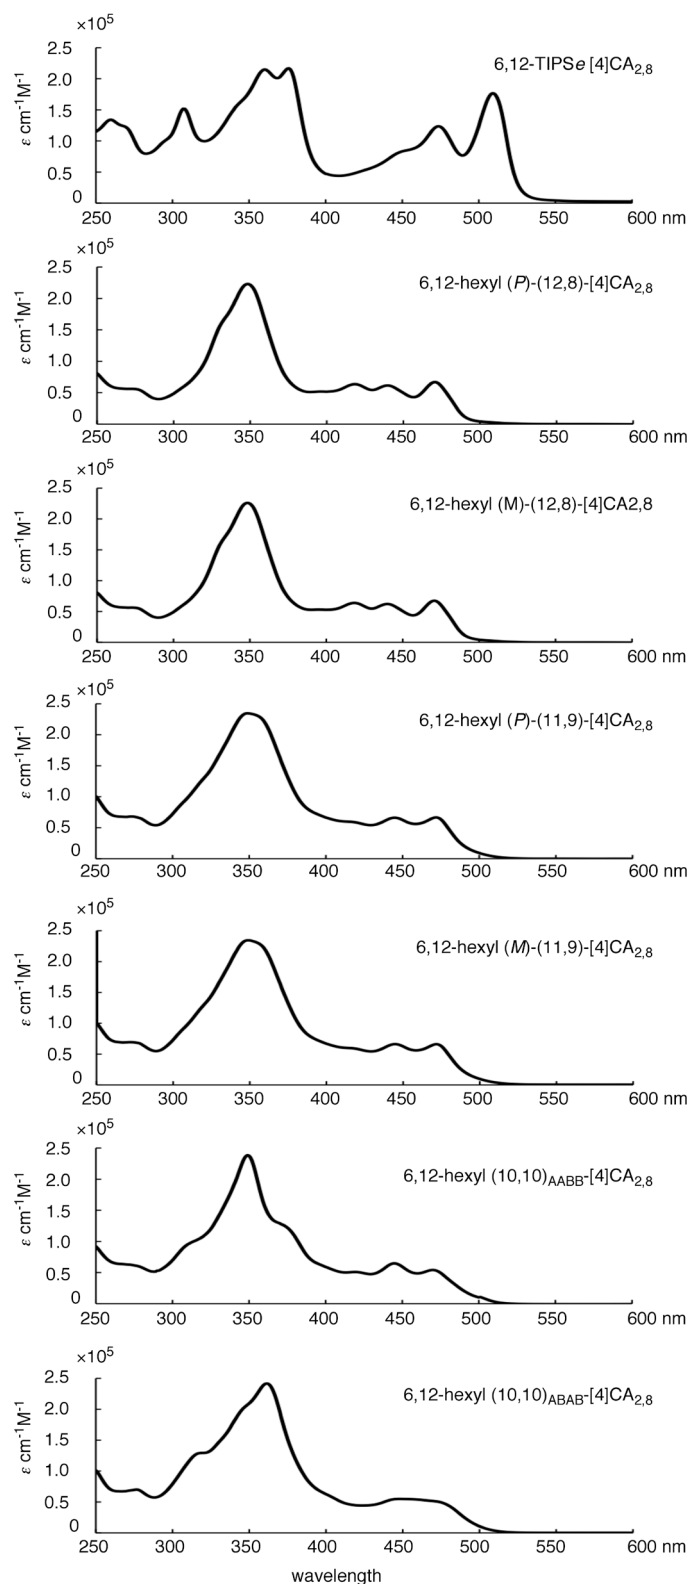

**Fig. S3.** UV-vis absorption spectra of [4]CA<sub>2,8</sub> isomers in chloroform. Concentrations are as follows: 6,12-TIPSe (P)/(M)-(12,8)-[4]CA<sub>2,8</sub> = 1.11 × 10<sup>-6</sup> M, 6,12-hexyl (P)-(12,8)-[4]CA<sub>2,8</sub> = 4.23 × 10<sup>-6</sup> M, 6,12-hexyl (M)-(12,8)-[4]CA<sub>2,8</sub> = 4.15 × 10<sup>-6</sup> M, 6,12-hexyl (P)-(11,9)-[4]CA<sub>2,8</sub> = 4.04 × 10<sup>-6</sup> M, 6,12-hexyl (M)-(12,8)-[4]CA<sub>2,8</sub> = 4.22 × 10<sup>-6</sup> M, 6,12-hexyl (10,10)<sub>AABB</sub>-[4]CA<sub>2,8</sub> = 3.82 × 10<sup>-6</sup> M, 6,12-hexyl (10,10)<sub>ABAB</sub>-[4]CA<sub>2,8</sub> = 4.04 × 10<sup>-6</sup> M.

## Theoretical calculations

### Computational methods

The Gaussian 09 program suite was used in all calculations,<sup>5,6</sup> and the results were visualized on GaussView 5.0.9.<sup>7</sup> Semiempirical calculations were performed at the PM6 level,<sup>8</sup> and DFT calculations were performed by the B3LYP functional, the gradient correction of the exchange functional by Becke<sup>9</sup> and the correlation functional by Lee, Yang and Parr<sup>10</sup> with the 6-31G(d,p) split valence plus polarization basis set.<sup>11</sup>

As reported,<sup>12</sup> theoretical CD spectra of 6,12-methyl [4]CA<sub>2,8</sub> were obtained by time-dependent DFT for the first 30 singlet–singlet transitions with an extra keyword of IOP(9/40 = 2) to output information on smaller contributions to each electronic transition. Cartesian coordinates for the optimized geometries are shown in Tables S1 and S2.

Energy profiles of single-bond rotation of biaryls were obtained by a relaxed potential energy surface scan method with the PM6 semiempirical calculations. Results are shown in Fig. 3 and S4. Cartesian coordinates of biaryls for the representative dihedral angles are shown in Tables S3-S12.

---

5. Gaussian 09, Revision B.01, Frisch, M. J.; Trucks, G. W.; Schlegel, H. B.; Scuseria, G. E.; Robb, M. A.; Cheeseman, J. R.; Scalmani, G.; Barone, V.; Mennucci, B.; Petersson, G. A.; Nakatsuji, H.; Caricato, M.; Li, X.; Hratchian, H. P.; Izmaylov, A. F.; Bloino, J.; Zheng, G.; Sonnenberg, J. L.; Hada, M.; Ehara, M.; Toyota, K.; Fukuda, R.; Hasegawa, J.; Ishida, M.; Nakajima, T.; Honda, Y.; Kitao, O.; Nakai, H.; Vreven, T.; Montgomery, J. A. Jr.; Peralta, J. E.; Ogliaro, F.; Bearpark, M.; Heyd, J. J.; Brothers, E.; Kudin, K. N.; Staroverov, V. N.; Kobayashi, R.; Normand, J.; Raghavachari, K.; Rendell, A.; Burant, J. C.; Iyengar, S. S.; Tomasi, J.; Cossi, M.; Rega, N.; Millam, J. M.; Klene, M.; Knox, J. E.; Cross, J. B.; Bakken, V.; Adamo, C.; Jaramillo, J.; Gomperts, R.; Stratmann, R. E.; Yazyev, O.; Austin, A. J.; Cammi, R.; Pomelli, C.; Ochterski, J. W.; Martin, R. L.; Morokuma, K.; Zakrzewski, V. G.; Voth, G. A.; Salvador, P.; Dannenberg, J. J.; Dapprich, S.; Daniels, A. D.; Farkas, O.; Foresman, J. B.; Ortiz, J. V.; Cioslowski, J.; Fox, D. J. Gaussian, Inc., Wallingford CT, **2009**.

6. Details including the references for the DFT method and basis set can be found online at the homepage of Gaussian, Inc.: <http://www.gaussian.com/>

7. Stephens, P. J.; Harada, N. *Chirality* **2010**, *22*, 229-233.

8. Stewart, J. J. P. *J. Mol. Model.* **2007**, *13*, 1173-1213.

9. Becke, A. D.; *Phys. Rev. A* **1988**, *38*, 3098-3100; A. D. Becke, *J. Chem. Phys.* **1993**, *98*, 5648-5652.

10. Lee, C.; Yang, W.; Parr, R. G. *Phys. Rev. B* **1988**, *37*, 785-789.

11. Ditchfield, R.; Hehre, W. J.; Pople, J. A. *J. Chem. Phys.* **1971**, *54*, 724-728; Hehre, W. J.; Ditchfield, R.; Pople, J. A.

*J. Chem. Phys.* **1972**, *56*, 2257-2261; Hariharan, P. C.; Pople, J. A. *Mol. Phys.* **1974**, *27*, 209-214; Gordon, M. S. *Chem.*

*Phys. Lett.* **1980**, *76*, 163-168; Hariharan, P. C.; Pople, J. A. *Theor. Chim. Acta.* **1973**, *28*, 213-222.

12. Hitosugi, S.; Nakanishi, W.; Yamasaki, T.; Isobe, H.; *Nat. Commun.* **2011**, *2*, doi:10.1038/ncomms1505.

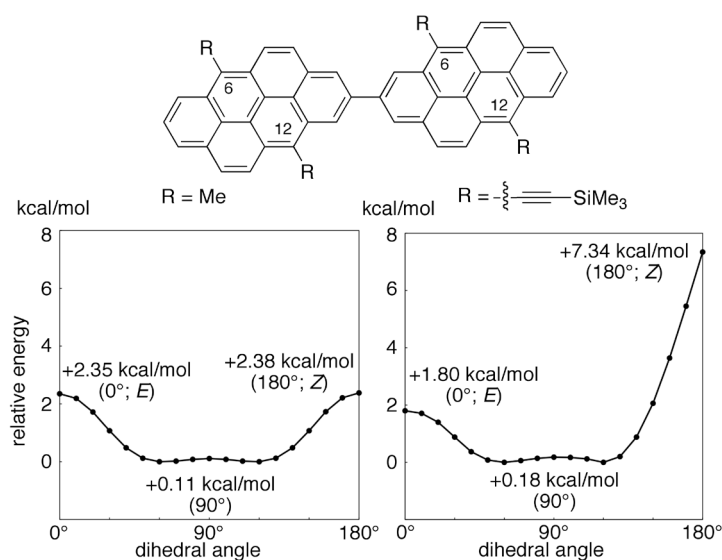

**Fig. S4.** Energy profile for rotation of biphenyl and 2,2'-bichrysenyl from PM6 calculations.

### Cartesian coordinates

**Table S1.** Cartesian coordinate of 6,12-methyl (*P*)-(12,8)-[4]CA<sub>2,8</sub>.

SCF Done: E(RB3LYP) = -3692.27490811 A.U. after 14 cycles

| Center Number | Atomic Number | Atomic Type | Coordinates (Angstroms) |           |           |
|---------------|---------------|-------------|-------------------------|-----------|-----------|
|               |               |             | X                       | Y         | Z         |
| 1             | 6             | 0           | -6.742611               | 1.938383  | 2.811806  |
| 2             | 6             | 0           | -6.866325               | 0.598696  | 2.997032  |
| 3             | 6             | 0           | -6.758428               | -0.336600 | 1.897166  |
| 4             | 6             | 0           | -6.735146               | 0.226541  | 0.567042  |
| 5             | 6             | 0           | -6.605009               | 1.624266  | 0.378083  |
| 6             | 6             | 0           | -6.494418               | 2.496932  | 1.505144  |
| 7             | 6             | 0           | -6.575298               | -1.710127 | 2.079640  |
| 8             | 6             | 0           | -6.710810               | -0.617276 | -0.567087 |
| 9             | 6             | 0           | -6.499497               | -2.005098 | -0.378329 |
| 10            | 6             | 0           | -6.308534               | -2.534136 | 0.935844  |
| 11            | 6             | 0           | -6.338428               | -2.869807 | -1.505387 |
| 12            | 6             | 0           | -6.619124               | -2.326706 | -2.811986 |
| 13            | 6             | 0           | -6.820929               | -0.996503 | -2.997059 |
| 14            | 6             | 0           | -6.767256               | -0.056571 | -1.897143 |

|    |   |   |           |           |           |
|----|---|---|-----------|-----------|-----------|
| 15 | 6 | 0 | -6.664147 | 1.325203  | -2.079915 |
| 16 | 6 | 0 | -6.445738 | 2.163422  | -0.936260 |
| 17 | 1 | 0 | -6.766463 | 2.611732  | 3.664737  |
| 18 | 1 | 0 | -6.603970 | -3.000336 | -3.664915 |
| 19 | 1 | 0 | -6.964055 | -0.622671 | -4.004197 |
| 20 | 6 | 0 | -5.704123 | -3.809966 | 1.049285  |
| 21 | 6 | 0 | -5.798081 | -4.140795 | -1.328885 |
| 22 | 1 | 0 | -5.638998 | -4.756895 | -2.208161 |
| 23 | 6 | 0 | -5.338119 | -4.572175 | -0.062577 |
| 24 | 1 | 0 | -5.376706 | -4.122599 | 2.031695  |
| 25 | 1 | 0 | -6.986578 | 0.217251  | 4.004290  |
| 26 | 6 | 0 | -5.916487 | 3.472261  | -1.049774 |
| 27 | 6 | 0 | -6.029329 | 3.797265  | 1.328413  |
| 28 | 6 | 0 | -5.595179 | 4.254398  | 0.062018  |
| 29 | 1 | 0 | -5.607749 | 3.803558  | -2.032089 |
| 30 | 1 | 0 | -5.906352 | 4.421903  | 2.207458  |
| 31 | 6 | 0 | -6.675248 | 1.943801  | -3.459186 |
| 32 | 1 | 0 | -7.309093 | 1.383939  | -4.149584 |
| 33 | 1 | 0 | -7.063369 | 2.964648  | -3.428596 |
| 34 | 1 | 0 | -5.670824 | 1.985462  | -3.901172 |
| 35 | 6 | 0 | -6.550581 | -2.329838 | 3.458181  |
| 36 | 1 | 0 | -5.543546 | -2.322923 | 3.896213  |
| 37 | 1 | 0 | -7.208575 | -1.803096 | 4.151929  |
| 38 | 1 | 0 | -6.887825 | -3.368625 | 3.427021  |
| 39 | 6 | 0 | 1.938280  | 6.742462  | 2.812162  |
| 40 | 6 | 0 | 0.598586  | 6.866168  | 2.997344  |
| 41 | 6 | 0 | -0.336668 | 6.758326  | 1.897437  |
| 42 | 6 | 0 | 0.226522  | 6.735111  | 0.567333  |
| 43 | 6 | 0 | 1.624255  | 6.604982  | 0.378421  |
| 44 | 6 | 0 | 2.496878  | 6.494334  | 1.505509  |
| 45 | 6 | 0 | -1.710202 | 6.575186  | 2.079850  |
| 46 | 6 | 0 | -0.617251 | 6.710833  | -0.566829 |
| 47 | 6 | 0 | -2.005081 | 6.499512  | -0.378134 |
| 48 | 6 | 0 | -2.534168 | 6.308482  | 0.936009  |
| 49 | 6 | 0 | -2.869748 | 6.338502  | -1.505233 |



|    |   |   |           |           |           |
|----|---|---|-----------|-----------|-----------|
| 50 | 6 | 0 | -2.326596 | 6.619266  | -2.811797 |
| 51 | 6 | 0 | -0.996386 | 6.821078  | -2.996810 |
| 52 | 6 | 0 | -0.056495 | 6.767347  | -1.896861 |
| 53 | 6 | 0 | 1.325285  | 6.664246  | -2.079586 |
| 54 | 6 | 0 | 2.163460  | 6.445778  | -0.935910 |
| 55 | 1 | 0 | 2.611597  | 6.766271  | 3.665120  |
| 56 | 1 | 0 | -3.000194 | 6.604158  | -3.664753 |
| 57 | 1 | 0 | -0.622517 | 6.964255  | -4.003926 |
| 58 | 6 | 0 | -3.810003 | 5.704064  | 1.049371  |
| 59 | 6 | 0 | -4.140743 | 5.798147  | -1.328808 |
| 60 | 1 | 0 | -4.756813 | 5.639112  | -2.208114 |
| 61 | 6 | 0 | -4.572169 | 5.338119  | -0.062539 |
| 62 | 1 | 0 | -4.122674 | 5.376594  | 2.031751  |
| 63 | 1 | 0 | 0.217102  | 6.986372  | 4.004593  |
| 64 | 6 | 0 | 3.472303  | 5.916533  | -1.049401 |
| 65 | 6 | 0 | 3.797216  | 6.029252  | 1.328804  |
| 66 | 6 | 0 | 4.254397  | 5.595166  | 0.062404  |
| 67 | 1 | 0 | 3.803639  | 5.607849  | -2.031720 |
| 68 | 1 | 0 | 4.421819  | 5.906231  | 2.207867  |
| 69 | 6 | 0 | 1.943936  | 6.675414  | -3.458833 |
| 70 | 1 | 0 | 1.384099  | 7.309288  | -4.149222 |
| 71 | 1 | 0 | 2.964781  | 7.063536  | -3.428186 |
| 72 | 1 | 0 | 1.985617  | 5.671011  | -3.900864 |
| 73 | 6 | 0 | -2.329966 | 6.550398  | 3.458366  |
| 74 | 1 | 0 | -2.323070 | 5.543340  | 3.896345  |
| 75 | 1 | 0 | -1.803250 | 7.208355  | 4.152169  |
| 76 | 1 | 0 | -3.368751 | 6.887645  | 3.427182  |
| 77 | 6 | 0 | 2.326802  | -6.619269 | -2.811650 |
| 78 | 6 | 0 | 0.996606  | -6.821083 | -2.996760 |
| 79 | 6 | 0 | 0.056634  | -6.767356 | -1.896879 |
| 80 | 6 | 0 | 0.617293  | -6.710843 | -0.566807 |
| 81 | 6 | 0 | 2.005108  | -6.499522 | -0.378010 |
| 82 | 6 | 0 | 2.869858  | -6.338509 | -1.505045 |
| 83 | 6 | 0 | -1.325133 | -6.664258 | -2.079706 |
| 84 | 6 | 0 | -0.226564 | -6.735123 | 0.567294  |

|     |   |   |           |           |           |
|-----|---|---|-----------|-----------|-----------|
| 85  | 6 | 0 | -1.624283 | -6.604995 | 0.378279  |
| 86  | 6 | 0 | -2.163392 | -6.445791 | -0.936091 |
| 87  | 6 | 0 | -2.496988 | -6.494347 | 1.505303  |
| 88  | 6 | 0 | -1.938486 | -6.742475 | 2.811997  |
| 89  | 6 | 0 | -0.598805 | -6.866181 | 2.997277  |
| 90  | 6 | 0 | 0.336529  | -6.758339 | 1.897439  |
| 91  | 6 | 0 | 1.710050  | -6.575202 | 2.079952  |
| 92  | 6 | 0 | 2.534100  | -6.308496 | 0.936173  |
| 93  | 1 | 0 | 3.000462  | -6.604157 | -3.664556 |
| 94  | 1 | 0 | -2.611865 | -6.766283 | 3.664905  |
| 95  | 1 | 0 | -0.217396 | -6.986383 | 4.004554  |
| 96  | 6 | 0 | -3.472228 | -5.916548 | -1.049678 |
| 97  | 6 | 0 | -3.797314 | -6.029266 | 1.328503  |
| 98  | 1 | 0 | -4.421982 | -5.906246 | 2.207520  |
| 99  | 6 | 0 | -4.254403 | -5.595180 | 0.062069  |
| 100 | 1 | 0 | -3.803491 | -5.607863 | -2.032022 |
| 101 | 1 | 0 | 0.622810  | -6.964258 | -4.003904 |
| 102 | 6 | 0 | 3.809927  | -5.704080 | 1.049629  |
| 103 | 6 | 0 | 4.140840  | -5.798154 | -1.328526 |
| 104 | 6 | 0 | 4.572174  | -5.338131 | -0.062224 |
| 105 | 1 | 0 | 4.122526  | -5.376612 | 2.032033  |
| 106 | 1 | 0 | 4.756974  | -5.639117 | -2.207786 |
| 107 | 6 | 0 | 2.329712  | -6.550419 | 3.458514  |
| 108 | 1 | 0 | 2.322783  | -5.543364 | 3.896498  |
| 109 | 1 | 0 | 1.802946  | -7.208380 | 4.152275  |
| 110 | 1 | 0 | 3.368500  | -6.887666 | 3.427406  |
| 111 | 6 | 0 | -1.943682 | -6.675430 | -3.458999 |
| 112 | 1 | 0 | -2.964531 | -7.063544 | -3.428426 |
| 113 | 1 | 0 | -1.985321 | -5.671030 | -3.901040 |
| 114 | 1 | 0 | -1.383798 | -7.309314 | -4.149341 |
| 115 | 6 | 0 | 6.742406  | -1.938407 | 2.812294  |
| 116 | 6 | 0 | 6.866107  | -0.598721 | 2.997535  |
| 117 | 6 | 0 | 6.758289  | 0.336579  | 1.897665  |
| 118 | 6 | 0 | 6.735105  | -0.226555 | 0.567537  |
| 119 | 6 | 0 | 6.604981  | -1.624280 | 0.378562  |

|     |   |   |          |           |           |
|-----|---|---|----------|-----------|-----------|
| 120 | 6 | 0 | 6.494309 | -2.496951 | 1.505611  |
| 121 | 6 | 0 | 6.575146 | 1.710106  | 2.080131  |
| 122 | 6 | 0 | 6.710852 | 0.617266  | -0.566590 |
| 123 | 6 | 0 | 6.499526 | 2.005087  | -0.377842 |
| 124 | 6 | 0 | 6.308466 | 2.534120  | 0.936319  |
| 125 | 6 | 0 | 6.338540 | 2.869801  | -1.504908 |
| 126 | 6 | 0 | 6.619333 | 2.326706  | -2.811489 |
| 127 | 6 | 0 | 6.821150 | 0.996504  | -2.996553 |
| 128 | 6 | 0 | 6.767395 | 0.056567  | -1.896644 |
| 129 | 6 | 0 | 6.664299 | -1.325206 | -2.079430 |
| 130 | 6 | 0 | 6.445807 | -2.163430 | -0.935795 |
| 131 | 1 | 0 | 6.766196 | -2.611760 | 3.665224  |
| 132 | 1 | 0 | 6.604243 | 3.000339  | -3.664416 |
| 133 | 1 | 0 | 6.964349 | 0.622676  | -4.003682 |
| 134 | 6 | 0 | 5.704045 | 3.809949  | 1.049721  |
| 135 | 6 | 0 | 5.798180 | 4.140788  | -1.328441 |
| 136 | 1 | 0 | 5.639162 | 4.756892  | -2.207725 |
| 137 | 6 | 0 | 5.338123 | 4.572162  | -0.062165 |
| 138 | 1 | 0 | 5.376555 | 4.122578  | 2.032108  |
| 139 | 1 | 0 | 6.986286 | -0.217280 | 4.004803  |
| 140 | 6 | 0 | 5.916565 | -3.472269 | -1.049353 |
| 141 | 6 | 0 | 6.029234 | -3.797283 | 1.328841  |
| 142 | 6 | 0 | 5.595176 | -4.254411 | 0.062412  |
| 143 | 1 | 0 | 5.607899 | -3.803562 | -2.031692 |
| 144 | 1 | 0 | 5.906194 | -4.421926 | 2.207874  |
| 145 | 6 | 0 | 6.675499 | -1.943798 | -3.458704 |
| 146 | 1 | 0 | 7.309394 | -1.383934 | -4.149053 |
| 147 | 1 | 0 | 7.063616 | -2.964646 | -3.428092 |
| 148 | 1 | 0 | 5.671107 | -1.985455 | -3.900762 |
| 149 | 6 | 0 | 6.550330 | 2.329812  | 3.458673  |
| 150 | 1 | 0 | 5.543264 | 2.322896  | 3.896632  |
| 151 | 1 | 0 | 7.208274 | 1.803067  | 4.152466  |
| 152 | 1 | 0 | 6.887577 | 3.368599  | 3.427540  |

---

**Table S2.** Cartesian coordinate of 6,12-methyl (*P*)-(11,9)-[4]CA<sub>2,8</sub>.

SCF Done: E(RB3LYP) = -3692.27443644 A.U. after 15 cycles

| Center<br>Number | Atomic<br>Number | Atomic<br>Type | Coordinates (Angstroms) |           |           |
|------------------|------------------|----------------|-------------------------|-----------|-----------|
|                  |                  |                | X                       | Y         | Z         |
| 1                | 6                | 0              | -0.247268               | -7.907335 | 2.165271  |
| 2                | 6                | 0              | 1.109402                | -7.837580 | 2.176957  |
| 3                | 6                | 0              | 1.849217                | -7.179213 | 1.120151  |
| 4                | 6                | 0              | 1.098801                | -6.803478 | -0.056061 |
| 5                | 6                | 0              | -0.315191               | -6.904553 | -0.076785 |
| 6                | 6                | 0              | -1.022157               | -7.343199 | 1.086846  |
| 7                | 6                | 0              | 3.191750                | -6.808534 | 1.247679  |
| 8                | 6                | 0              | 1.750363                | -6.195937 | -1.153897 |
| 9                | 6                | 0              | 3.088705                | -5.758936 | -0.992447 |
| 10               | 6                | 0              | 3.778576                | -5.964449 | 0.244858  |
| 11               | 6                | 0              | 3.706988                | -4.972175 | -2.011751 |
| 12               | 6                | 0              | 3.036352                | -4.858997 | -3.282976 |
| 13               | 6                | 0              | 1.768242                | -5.310383 | -3.454776 |
| 14               | 6                | 0              | 1.019384                | -5.894926 | -2.363379 |
| 15               | 6                | 0              | -0.367222               | -6.055289 | -2.404256 |
| 16               | 6                | 0              | -1.055846               | -6.428378 | -1.203888 |
| 17               | 1                | 0              | -0.777732               | -8.344448 | 3.007310  |
| 18               | 1                | 0              | 3.552162                | -4.352216 | -4.094346 |
| 19               | 1                | 0              | 1.279463                | -5.159029 | -4.410098 |
| 20               | 6                | 0              | 4.939504                | -5.189187 | 0.493231  |
| 21               | 6                | 0              | 4.836932                | -4.220656 | -1.705575 |
| 22               | 1                | 0              | 5.193986                | -3.515755 | -2.448519 |
| 23               | 6                | 0              | 5.394764                | -4.221999 | -0.407578 |
| 24               | 1                | 0              | 5.406402                | -5.258973 | 1.468277  |
| 25               | 1                | 0              | 1.645964                | -8.223608 | 3.035850  |
| 26               | 6                | 0              | -2.434799               | -6.165007 | -1.022534 |
| 27               | 6                | 0              | -2.388906               | -7.092280 | 1.198399  |
| 28               | 6                | 0              | -3.082280               | -6.376544 | 0.195277  |
| 29               | 1                | 0              | -2.954006               | -5.612220 | -1.795220 |
| 30               | 1                | 0              | -2.896449               | -7.365039 | 2.119478  |

|    |   |   |           |           |           |
|----|---|---|-----------|-----------|-----------|
| 31 | 6 | 0 | -1.164839 | -5.729458 | -3.646208 |
| 32 | 1 | 0 | -0.608179 | -5.963006 | -4.556123 |
| 33 | 1 | 0 | -2.089620 | -6.309944 | -3.681409 |
| 34 | 1 | 0 | -1.439411 | -4.667356 | -3.695710 |
| 35 | 6 | 0 | 3.999965  | -7.172392 | 2.472022  |
| 36 | 1 | 0 | 3.918872  | -6.414682 | 3.262934  |
| 37 | 1 | 0 | 3.679734  | -8.123594 | 2.900908  |
| 38 | 1 | 0 | 5.059541  | -7.275640 | 2.225328  |
| 39 | 6 | 0 | -7.630361 | 0.182570  | -2.353240 |
| 40 | 6 | 0 | -7.564894 | -1.174171 | -2.373876 |
| 41 | 6 | 0 | -7.001764 | -1.929277 | -1.273744 |
| 42 | 6 | 0 | -6.714700 | -1.191548 | -0.064675 |
| 43 | 6 | 0 | -6.800486 | 0.223176  | -0.041284 |
| 44 | 6 | 0 | -7.149540 | 0.944001  | -1.226027 |
| 45 | 6 | 0 | -6.641854 | -3.276600 | -1.379055 |
| 46 | 6 | 0 | -6.216000 | -1.859491 | 1.077037  |
| 47 | 6 | 0 | -5.799956 | -3.208533 | 0.949014  |
| 48 | 6 | 0 | -5.905520 | -3.887523 | -0.307950 |
| 49 | 6 | 0 | -5.135868 | -3.852982 | 2.036871  |
| 50 | 6 | 0 | -5.117901 | -3.186494 | 3.314665  |
| 51 | 6 | 0 | -5.541139 | -1.904110 | 3.447959  |
| 52 | 6 | 0 | -6.005476 | -1.138795 | 2.311665  |
| 53 | 6 | 0 | -6.138082 | 0.251254  | 2.345572  |
| 54 | 6 | 0 | -6.404332 | 0.951624  | 1.124103  |
| 55 | 1 | 0 | -7.997751 | 0.723468  | -3.221554 |
| 56 | 1 | 0 | -4.704084 | -3.718485 | 4.167245  |
| 57 | 1 | 0 | -5.461216 | -1.420413 | 4.414380  |
| 58 | 6 | 0 | -5.143904 | -5.070006 | -0.488515 |
| 59 | 6 | 0 | -4.402409 | -5.011972 | 1.801640  |
| 60 | 1 | 0 | -3.786485 | -5.401977 | 2.605303  |
| 61 | 6 | 0 | -4.295036 | -5.562477 | 0.505868  |
| 62 | 1 | 0 | -5.121835 | -5.531868 | -1.468878 |
| 63 | 1 | 0 | -7.883155 | -1.699731 | -3.266692 |
| 64 | 6 | 0 | -6.119932 | 2.330305  | 0.974378  |
| 65 | 6 | 0 | -6.896784 | 2.312485  | -1.301479 |

|     |   |   |           |           |           |
|-----|---|---|-----------|-----------|-----------|
| 66  | 6 | 0 | -6.250718 | 2.996125  | -0.244889 |
| 67  | 1 | 0 | -5.622908 | 2.836023  | 1.791953  |
| 68  | 1 | 0 | -7.115172 | 2.829208  | -2.231360 |
| 69  | 6 | 0 | -5.897563 | 1.035895  | 3.615047  |
| 70  | 1 | 0 | -4.835463 | 1.274613  | 3.759330  |
| 71  | 1 | 0 | -6.448423 | 1.979058  | 3.604273  |
| 72  | 1 | 0 | -6.228533 | 0.485896  | 4.498462  |
| 73  | 6 | 0 | -6.908531 | -4.071351 | -2.636942 |
| 74  | 1 | 0 | -7.053949 | -5.129870 | -2.407775 |
| 75  | 1 | 0 | -7.810172 | -3.730395 | -3.148732 |
| 76  | 1 | 0 | -6.080328 | -4.001479 | -3.354877 |
| 77  | 6 | 0 | 6.702240  | 3.832912  | -2.146601 |
| 78  | 6 | 0 | 7.224884  | 2.589047  | -2.304585 |
| 79  | 6 | 0 | 7.078803  | 1.564558  | -1.291315 |
| 80  | 6 | 0 | 6.547861  | 1.988445  | -0.015844 |
| 81  | 6 | 0 | 6.030620  | 3.297298  | 0.155683  |
| 82  | 6 | 0 | 5.989264  | 4.205611  | -0.949069 |
| 83  | 6 | 0 | 7.322610  | 0.209751  | -1.538241 |
| 84  | 6 | 0 | 6.410643  | 1.061641  | 1.043218  |
| 85  | 6 | 0 | 6.587239  | -0.317267 | 0.766639  |
| 86  | 6 | 0 | 6.938370  | -0.758095 | -0.549214 |
| 87  | 6 | 0 | 6.267114  | -1.288903 | 1.763509  |
| 88  | 6 | 0 | 6.009794  | -0.826672 | 3.104485  |
| 89  | 6 | 0 | 5.879953  | 0.495002  | 3.383228  |
| 90  | 6 | 0 | 5.959523  | 1.498813  | 2.344355  |
| 91  | 6 | 0 | 5.513594  | 2.809321  | 2.529651  |
| 92  | 6 | 0 | 5.418586  | 3.675320  | 1.391856  |
| 93  | 1 | 0 | 6.767957  | 4.557973  | -2.953733 |
| 94  | 1 | 0 | 5.868886  | -1.567880 | 3.886759  |
| 95  | 1 | 0 | 5.635577  | 0.798719  | 4.394388  |
| 96  | 6 | 0 | 6.732797  | -2.124216 | -0.868100 |
| 97  | 6 | 0 | 6.060317  | -2.612720 | 1.388368  |
| 98  | 1 | 0 | 5.667984  | -3.296040 | 2.133687  |
| 99  | 6 | 0 | 6.168506  | -3.023647 | 0.041221  |
| 100 | 1 | 0 | 6.896815  | -2.445488 | -1.889606 |

|     |   |   |           |           |           |
|-----|---|---|-----------|-----------|-----------|
| 101 | 1 | 0 | 7.703463  | 2.338403  | -3.244173 |
| 102 | 6 | 0 | 4.584710  | 4.819426  | 1.392933  |
| 103 | 6 | 0 | 5.176091  | 5.335626  | -0.883079 |
| 104 | 6 | 0 | 4.362774  | 5.582635  | 0.246521  |
| 105 | 1 | 0 | 3.965213  | 4.999415  | 2.262391  |
| 106 | 1 | 0 | 5.100408  | 5.978519  | -1.755689 |
| 107 | 6 | 0 | 5.022673  | 3.295798  | 3.873948  |
| 108 | 1 | 0 | 3.954633  | 3.089884  | 4.024787  |
| 109 | 1 | 0 | 5.563485  | 2.823951  | 4.696676  |
| 110 | 1 | 0 | 5.166305  | 4.373960  | 3.976340  |
| 111 | 6 | 0 | 7.867242  | -0.268309 | -2.864467 |
| 112 | 1 | 0 | 8.457819  | -1.179146 | -2.738512 |
| 113 | 1 | 0 | 7.068882  | -0.491511 | -3.584909 |
| 114 | 1 | 0 | 8.522005  | 0.473022  | -3.325812 |
| 115 | 6 | 0 | 0.323595  | 7.413312  | 2.492231  |
| 116 | 6 | 0 | -1.029850 | 7.313481  | 2.547651  |
| 117 | 6 | 0 | -1.809414 | 6.847030  | 1.419575  |
| 118 | 6 | 0 | -1.105737 | 6.698344  | 0.165553  |
| 119 | 6 | 0 | 0.304607  | 6.831081  | 0.104812  |
| 120 | 6 | 0 | 1.057406  | 7.074884  | 1.297198  |
| 121 | 6 | 0 | -3.146062 | 6.450851  | 1.529086  |
| 122 | 6 | 0 | -1.798394 | 6.288492  | -0.997079 |
| 123 | 6 | 0 | -3.130564 | 5.821139  | -0.866266 |
| 124 | 6 | 0 | -3.775370 | 5.802960  | 0.412116  |
| 125 | 6 | 0 | -3.790352 | 5.231186  | -1.986968 |
| 126 | 6 | 0 | -3.165090 | 5.342512  | -3.280469 |
| 127 | 6 | 0 | -1.903845 | 5.824558  | -3.416351 |
| 128 | 6 | 0 | -1.116389 | 6.218556  | -2.268807 |
| 129 | 6 | 0 | 0.265088  | 6.414334  | -2.337581 |
| 130 | 6 | 0 | 1.001117  | 6.587445  | -1.120699 |
| 131 | 1 | 0 | 0.885127  | 7.702276  | 3.376932  |
| 132 | 1 | 0 | -3.710506 | 4.982619  | -4.148916 |
| 133 | 1 | 0 | -1.451004 | 5.845319  | -4.400617 |
| 134 | 6 | 0 | -4.941599 | 5.010657  | 0.556476  |
| 135 | 6 | 0 | -4.923795 | 4.449529  | -1.782479 |



|     |   |   |           |          |           |
|-----|---|---|-----------|----------|-----------|
| 136 | 1 | 0 | -5.318636 | 3.894591 | -2.626676 |
| 137 | 6 | 0 | -5.444352 | 4.230219 | -0.488640 |
| 138 | 1 | 0 | -5.381584 | 4.911501 | 1.541472  |
| 139 | 1 | 0 | -1.531401 | 7.525706 | 3.484581  |
| 140 | 6 | 0 | 2.395656  | 6.351228 | -1.051989 |
| 141 | 6 | 0 | 2.434251  | 6.859193 | 1.300936  |
| 142 | 6 | 0 | 3.097670  | 6.368233 | 0.153074  |
| 143 | 1 | 0 | 2.894495  | 5.973770 | -1.935554 |
| 144 | 1 | 0 | 2.981492  | 6.982423 | 2.231438  |
| 145 | 6 | 0 | 1.009969  | 6.333703 | -3.650477 |
| 146 | 1 | 0 | 0.408010  | 6.709740 | -4.480149 |
| 147 | 1 | 0 | 1.921515  | 6.935017 | -3.622056 |
| 148 | 1 | 0 | 1.301473  | 5.304577 | -3.898950 |
| 149 | 6 | 0 | -3.909178 | 6.579382 | 2.827557  |
| 150 | 1 | 0 | -3.835961 | 5.671813 | 3.441728  |
| 151 | 1 | 0 | -3.547075 | 7.411157 | 3.433707  |
| 152 | 1 | 0 | -4.970536 | 6.761255 | 2.640076  |

**Table S3.** Cartesian coordinates of 6,12-methyl 2,2'-bianthanthrenyl (dihedral angle = 0°).

SCF Done: E(RPM6) = 0.240258928185 A.U. after 23 cycles

| Center<br>Number | Atomic<br>Number | Atomic<br>Type | Coordinates (Angstroms) |           |           |
|------------------|------------------|----------------|-------------------------|-----------|-----------|
|                  |                  |                | X                       | Y         | Z         |
| 1                | 6                | 0              | -3.304744               | -2.866164 | 0.167215  |
| 2                | 6                | 0              | -4.643881               | -3.028504 | 0.168004  |
| 3                | 6                | 0              | -5.566688               | -1.896917 | 0.099311  |
| 4                | 6                | 0              | -4.988646               | -0.571089 | 0.029127  |
| 5                | 6                | 0              | -3.562018               | -0.400425 | 0.025643  |
| 6                | 6                | 0              | -2.697137               | -1.541957 | 0.094517  |
| 7                | 6                | 0              | -6.941361               | -2.064011 | 0.101589  |
| 8                | 6                | 0              | -5.816965               | 0.559849  | -0.034709 |
| 9                | 6                | 0              | -7.244627               | 0.389393  | -0.032189 |
| 10               | 6                | 0              | -7.810784               | -0.911259 | 0.034698  |

|    |   |   |            |           |           |
|----|---|---|------------|-----------|-----------|
| 11 | 6 | 0 | -8.105849  | 1.535547  | -0.096980 |
| 12 | 6 | 0 | -7.495999  | 2.858085  | -0.163655 |
| 13 | 6 | 0 | -6.156742  | 3.018680  | -0.165081 |
| 14 | 6 | 0 | -5.236080  | 1.884849  | -0.101014 |
| 15 | 6 | 0 | -3.861254  | 2.051360  | -0.102222 |
| 16 | 6 | 0 | -2.991964  | 0.897233  | -0.039268 |
| 17 | 1 | 0 | -2.630362  | -3.720519 | 0.219546  |
| 18 | 1 | 0 | -5.077265  | -4.027984 | 0.221928  |
| 19 | 1 | 0 | -8.169662  | 3.713629  | -0.211990 |
| 20 | 1 | 0 | -5.721896  | 4.017542  | -0.215161 |
| 21 | 6 | 0 | -9.228655  | -1.033264 | 0.034447  |
| 22 | 6 | 0 | -10.043530 | 0.078709  | -0.028881 |
| 23 | 1 | 0 | -11.127302 | -0.031280 | -0.028139 |
| 24 | 6 | 0 | -9.484907  | 1.372705  | -0.094992 |
| 25 | 1 | 0 | -10.145147 | 2.236691  | -0.143937 |
| 26 | 6 | 0 | -1.320583  | -1.378905 | 0.093411  |
| 27 | 6 | 0 | -0.737241  | -0.086737 | 0.008093  |
| 28 | 6 | 0 | -1.577081  | 1.018704  | -0.038246 |
| 29 | 1 | 0 | -0.670827  | -2.253496 | 0.154141  |
| 30 | 1 | 0 | -1.148944  | 2.027111  | -0.080367 |
| 31 | 1 | 0 | -9.668894  | -2.032314 | 0.085893  |
| 32 | 6 | 0 | -7.541265  | -3.433703 | 0.173548  |
| 33 | 1 | 0 | -7.229543  | -4.050854 | -0.682003 |
| 34 | 1 | 0 | -7.238040  | -3.953831 | 1.094160  |
| 35 | 1 | 0 | -8.642243  | -3.423337 | 0.167727  |
| 36 | 6 | 0 | -3.261507  | 3.421425  | -0.169681 |
| 37 | 1 | 0 | -3.564751  | 3.944223  | -1.088796 |
| 38 | 1 | 0 | -3.573519  | 4.035539  | 0.687972  |
| 39 | 1 | 0 | -2.160638  | 3.410713  | -0.163706 |
| 40 | 6 | 0 | 0.737244   | 0.070598  | 0.053322  |
| 41 | 6 | 0 | 1.580201   | -1.030609 | -0.028230 |
| 42 | 6 | 0 | 1.316515   | 1.366385  | 0.100064  |
| 43 | 6 | 0 | 2.994710   | -0.904866 | -0.030083 |
| 44 | 1 | 0 | 1.154982   | -2.039365 | -0.089387 |
| 45 | 6 | 0 | 2.692574   | 1.533568  | 0.100917  |

|    |   |   |           |           |           |
|----|---|---|-----------|-----------|-----------|
| 46 | 1 | 0 | 0.664038  | 2.240020  | 0.140476  |
| 47 | 6 | 0 | 3.867409  | -2.056019 | -0.100576 |
| 48 | 6 | 0 | 3.560895  | 0.394353  | 0.037692  |
| 49 | 6 | 0 | 3.296162  | 2.860090  | 0.163297  |
| 50 | 6 | 0 | 5.241730  | -1.885396 | -0.099363 |
| 51 | 6 | 0 | 3.271735  | -3.427617 | -0.173258 |
| 52 | 6 | 0 | 4.986981  | 0.569512  | 0.036493  |
| 53 | 6 | 0 | 4.634811  | 3.026398  | 0.164844  |
| 54 | 1 | 0 | 2.619199  | 3.712693  | 0.210093  |
| 55 | 6 | 0 | 6.165760  | -3.016285 | -0.167155 |
| 56 | 6 | 0 | 5.818664  | -0.558804 | -0.030165 |
| 57 | 1 | 0 | 3.575293  | -3.945438 | -1.095115 |
| 58 | 1 | 0 | 3.586800  | -4.044576 | 0.681257  |
| 59 | 1 | 0 | 2.170847  | -3.420276 | -0.165707 |
| 60 | 6 | 0 | 5.561029  | 1.897296  | 0.101923  |
| 61 | 1 | 0 | 5.065173  | 4.027446  | 0.213130  |
| 62 | 6 | 0 | 7.504528  | -2.851655 | -0.166343 |
| 63 | 1 | 0 | 5.733894  | -4.016343 | -0.219309 |
| 64 | 6 | 0 | 7.245796  | -0.383944 | -0.030399 |
| 65 | 6 | 0 | 6.935186  | 2.068602  | 0.102156  |
| 66 | 6 | 0 | 8.110427  | -1.527375 | -0.098068 |
| 67 | 1 | 0 | 8.180733  | -3.705053 | -0.217259 |
| 68 | 6 | 0 | 7.808056  | 0.918432  | 0.035763  |
| 69 | 6 | 0 | 7.530970  | 3.440271  | 0.170249  |
| 70 | 6 | 0 | 9.488982  | -1.360315 | -0.098003 |
| 71 | 6 | 0 | 9.225543  | 1.044790  | 0.033215  |
| 72 | 1 | 0 | 7.215982  | 4.054640  | -0.686093 |
| 73 | 1 | 0 | 7.227603  | 3.961406  | 1.090239  |
| 74 | 1 | 0 | 8.631965  | 3.433285  | 0.162672  |
| 75 | 6 | 0 | 10.043733 | -0.064662 | -0.031707 |
| 76 | 1 | 0 | 10.151793 | -2.222222 | -0.148995 |
| 77 | 1 | 0 | 9.662787  | 2.045191  | 0.083872  |
| 78 | 1 | 0 | 11.127161 | 0.048657  | -0.032776 |

---

**Table S4.** Cartesian coordinates of 6,12-methyl 2,2'-bianthanthrenyl (dihedral angle = 60°).

SCF Done: E(RPM6) = 0.236594695853 A.U. after 28 cycles

| Center<br>Number | Atomic<br>Number | Atomic<br>Type | Coordinates (Angstroms) |           |           |
|------------------|------------------|----------------|-------------------------|-----------|-----------|
|                  |                  |                | X                       | Y         | Z         |
| 1                | 6                | 0              | -3.416356               | -2.424224 | 1.682018  |
| 2                | 6                | 0              | -4.760608               | -2.534770 | 1.691487  |
| 3                | 6                | 0              | -5.626559               | -1.569527 | 1.016993  |
| 4                | 6                | 0              | -4.986246               | -0.469265 | 0.326377  |
| 5                | 6                | 0              | -3.553420               | -0.353310 | 0.315330  |
| 6                | 6                | 0              | -2.746351               | -1.328609 | 0.991078  |
| 7                | 6                | 0              | -7.006618               | -1.684216 | 1.028461  |
| 8                | 6                | 0              | -5.760712               | 0.494949  | -0.337127 |
| 9                | 6                | 0              | -7.193943               | 0.378572  | -0.326831 |
| 10               | 6                | 0              | -7.820342               | -0.701871 | 0.349124  |
| 11               | 6                | 0              | -8.000193               | 1.356066  | -1.000780 |
| 12               | 6                | 0              | -7.330115               | 2.454894  | -1.685656 |
| 13               | 6                | 0              | -5.985848               | 2.565330  | -1.695166 |
| 14               | 6                | 0              | -5.120098               | 1.596974  | -1.024570 |
| 15               | 6                | 0              | -3.740147               | 1.712561  | -1.035099 |
| 16               | 6                | 0              | -2.926481               | 0.728593  | -0.357184 |
| 17               | 1                | 0              | -2.783549               | -3.151003 | 2.191396  |
| 18               | 1                | 0              | -5.241333               | -3.362593 | 2.214300  |
| 19               | 1                | 0              | -7.962666               | 3.185041  | -2.190398 |
| 20               | 1                | 0              | -5.504797               | 3.395675  | -2.213462 |
| 21               | 6                | 0              | -9.241384               | -0.778178 | 0.333695  |
| 22               | 6                | 0              | -10.002720              | 0.169568  | -0.319358 |
| 23               | 1                | 0              | -11.089654              | 0.097342  | -0.322046 |
| 24               | 6                | 0              | -9.384377               | 1.244869  | -0.991908 |
| 25               | 1                | 0              | -10.002841              | 1.982024  | -1.500647 |
| 26               | 6                | 0              | -1.363323               | -1.220814 | 0.982504  |
| 27               | 6                | 0              | -0.738780               | -0.150693 | 0.296543  |
| 28               | 6                | 0              | -1.507491               | 0.809496  | -0.339743 |
| 29               | 1                | 0              | -0.744943               | -1.950616 | 1.503536  |

|    |   |   |           |           |           |
|----|---|---|-----------|-----------|-----------|
| 30 | 1 | 0 | -1.021252 | 1.644737  | -0.851989 |
| 31 | 1 | 0 | -9.727513 | -1.608081 | 0.852879  |
| 32 | 6 | 0 | -7.669934 | -2.821138 | 1.741849  |
| 33 | 1 | 0 | -7.354785 | -3.790105 | 1.327408  |
| 34 | 1 | 0 | -7.424760 | -2.816086 | 2.814179  |
| 35 | 1 | 0 | -8.768351 | -2.792549 | 1.671581  |
| 36 | 6 | 0 | -3.076491 | 2.850651  | -1.745977 |
| 37 | 1 | 0 | -3.332367 | 2.856704  | -2.815755 |
| 38 | 1 | 0 | -3.379774 | 3.818175  | -1.319841 |
| 39 | 1 | 0 | -1.977193 | 2.812878  | -1.688816 |
| 40 | 6 | 0 | 0.737585  | -0.025523 | 0.335413  |
| 41 | 6 | 0 | 1.536422  | -0.937289 | -0.334485 |
| 42 | 6 | 0 | 1.323792  | 1.079890  | 0.998486  |
| 43 | 6 | 0 | 2.952004  | -0.809775 | -0.349399 |
| 44 | 1 | 0 | 1.077663  | -1.774584 | -0.868344 |
| 45 | 6 | 0 | 2.702570  | 1.232490  | 1.010402  |
| 46 | 1 | 0 | 0.679906  | 1.796115  | 1.507219  |
| 47 | 6 | 0 | 3.797957  | -1.758083 | -1.038671 |
| 48 | 6 | 0 | 3.542421  | 0.285625  | 0.334056  |
| 49 | 6 | 0 | 3.334887  | 2.349725  | 1.702025  |
| 50 | 6 | 0 | 5.173406  | -1.597804 | -1.024883 |
| 51 | 6 | 0 | 3.172596  | -2.909407 | -1.762746 |
| 52 | 6 | 0 | 4.970438  | 0.450392  | 0.344815  |
| 53 | 6 | 0 | 4.674861  | 2.503305  | 1.715463  |
| 54 | 1 | 0 | 2.677616  | 3.054889  | 2.210848  |
| 55 | 6 | 0 | 6.071116  | -2.530757 | -1.703747 |
| 56 | 6 | 0 | 5.776828  | -0.481978 | -0.326265 |
| 57 | 1 | 0 | 3.428735  | -2.894755 | -2.832442 |
| 58 | 1 | 0 | 3.507755  | -3.871146 | -1.347526 |
| 59 | 1 | 0 | 2.072642  | -2.908794 | -1.705607 |
| 60 | 6 | 0 | 5.573207  | 1.568433  | 1.040478  |
| 61 | 1 | 0 | 5.127220  | 3.345504  | 2.240472  |
| 62 | 6 | 0 | 7.411030  | -2.376477 | -1.691527 |
| 63 | 1 | 0 | 5.618088  | -3.371447 | -2.230462 |
| 64 | 6 | 0 | 7.205351  | -0.317747 | -0.314783 |

|    |   |   |           |           |           |
|----|---|---|-----------|-----------|-----------|
| 65 | 6 | 0 | 6.948675  | 1.728832  | 1.053648  |
| 66 | 6 | 0 | 8.043942  | -1.262216 | -0.996441 |
| 67 | 1 | 0 | 8.067703  | -3.080717 | -2.202350 |
| 68 | 6 | 0 | 7.795094  | 0.778024  | 0.369280  |
| 69 | 6 | 0 | 7.573273  | 2.883585  | 1.773146  |
| 70 | 6 | 0 | 9.423660  | -1.105170 | -0.985856 |
| 71 | 6 | 0 | 9.212791  | 0.901775  | 0.355074  |
| 72 | 1 | 0 | 7.226081  | 3.843585  | 1.363547  |
| 73 | 1 | 0 | 7.327930  | 2.864804  | 2.845316  |
| 74 | 1 | 0 | 8.672057  | 2.892095  | 1.703227  |
| 75 | 6 | 0 | 10.005570 | -0.015248 | -0.304534 |
| 76 | 1 | 0 | 10.066517 | -1.817141 | -1.500298 |
| 77 | 1 | 0 | 9.670750  | 1.743759  | 0.880271  |
| 78 | 1 | 0 | 11.089482 | 0.093221  | -0.306222 |

**Table S5.** Cartesian coordinates of 6,12-methyl 2,2'-bianthanthrenyl (dihedral angle = 90°).

SCF Done: E(RPM6) = 0.236731379916 A.U. after 19 cycles

| Center<br>Number | Atomic<br>Number | Atomic<br>Type | Coordinates (Angstroms) |           |           |
|------------------|------------------|----------------|-------------------------|-----------|-----------|
|                  |                  |                | X                       | Y         | Z         |
| 1                | 6                | 0              | -3.490820               | 2.320238  | 1.899905  |
| 2                | 6                | 0              | -4.837574               | 2.336325  | 1.972832  |
| 3                | 6                | 0              | -5.670184               | 1.407087  | 1.211402  |
| 4                | 6                | 0              | -4.993400               | 0.450954  | 0.359653  |
| 5                | 6                | 0              | -3.557817               | 0.432740  | 0.284571  |
| 6                | 6                | 0              | -2.784506               | 1.366085  | 1.052984  |
| 7                | 6                | 0              | -7.052864               | 1.425822  | 1.286852  |
| 8                | 6                | 0              | -5.734879               | -0.465895 | -0.401467 |
| 9                | 6                | 0              | -7.170817               | -0.448629 | -0.325423 |
| 10               | 6                | 0              | -7.832915               | 0.487951  | 0.511920  |
| 11               | 6                | 0              | -7.943579               | -1.379539 | -1.097343 |
| 12               | 6                | 0              | -7.237319               | -2.328585 | -1.949434 |
| 13               | 6                | 0              | -5.890529               | -2.344843 | -2.022230 |

|    |   |   |            |           |           |
|----|---|---|------------|-----------|-----------|
| 14 | 6 | 0 | -5.058028  | -1.419050 | -1.256309 |
| 15 | 6 | 0 | -3.675353  | -1.437419 | -1.332642 |
| 16 | 6 | 0 | -2.895489  | -0.502476 | -0.553580 |
| 17 | 1 | 0 | -2.882857  | 3.020199  | 2.473213  |
| 18 | 1 | 0 | -5.345756  | 3.058109  | 2.613567  |
| 19 | 1 | 0 | -7.844860  | -3.025422 | -2.526716 |
| 20 | 1 | 0 | -5.382045  | -3.063021 | -2.666630 |
| 21 | 6 | 0 | -9.255245  | 0.469452  | 0.557149  |
| 22 | 6 | 0 | -9.984138  | -0.432634 | -0.190704 |
| 23 | 1 | 0 | -11.072534 | -0.434253 | -0.145221 |
| 24 | 6 | 0 | -9.330299  | -1.364471 | -1.024442 |
| 25 | 1 | 0 | -9.923467  | -2.067202 | -1.606650 |
| 26 | 6 | 0 | -1.398950  | 1.353021  | 0.982482  |
| 27 | 6 | 0 | -0.741317  | 0.405198  | 0.162286  |
| 28 | 6 | 0 | -1.474467  | -0.486715 | -0.600167 |
| 29 | 1 | 0 | -0.803866  | 2.062864  | 1.555584  |
| 30 | 1 | 0 | -0.959545  | -1.199436 | -1.250632 |
| 31 | 1 | 0 | -9.768781  | 1.188715  | 1.200267  |
| 32 | 6 | 0 | -7.753809  | 2.413389  | 2.167176  |
| 33 | 1 | 0 | -7.460733  | 2.287350  | 3.219930  |
| 34 | 1 | 0 | -7.519359  | 3.446843  | 1.872266  |
| 35 | 1 | 0 | -8.850290  | 2.319161  | 2.133706  |
| 36 | 6 | 0 | -2.974111  | -2.420775 | -2.217127 |
| 37 | 1 | 0 | -3.208066  | -3.455730 | -1.927702 |
| 38 | 1 | 0 | -3.265710  | -2.289323 | -3.269563 |
| 39 | 1 | 0 | -1.877178  | -2.326616 | -2.182616 |
| 40 | 6 | 0 | 0.738940   | 0.436033  | 0.065127  |
| 41 | 6 | 0 | 1.507212   | -0.448292 | 0.801834  |
| 42 | 6 | 0 | 1.352339   | 1.326396  | -0.847954 |
| 43 | 6 | 0 | 2.924620   | -0.463630 | 0.690591  |
| 44 | 1 | 0 | 1.023994   | -1.148770 | 1.488894  |
| 45 | 6 | 0 | 2.733178   | 1.339253  | -0.982121 |
| 46 | 1 | 0 | 0.727797   | 1.999082  | -1.434357 |
| 47 | 6 | 0 | 3.742295   | -1.371285 | 1.463381  |
| 48 | 6 | 0 | 3.544629   | 0.441643  | -0.210304 |



|    |   |   |           |           |           |
|----|---|---|-----------|-----------|-----------|
| 49 | 6 | 0 | 3.395847  | 2.254320  | -1.903875 |
| 50 | 6 | 0 | 5.119956  | -1.353242 | 1.323407  |
| 51 | 6 | 0 | 3.085542  | -2.324430 | 2.412566  |
| 52 | 6 | 0 | 4.974924  | 0.456511  | -0.354782 |
| 53 | 6 | 0 | 4.737844  | 2.270622  | -2.038196 |
| 54 | 1 | 0 | 2.759377  | 2.926720  | -2.479336 |
| 55 | 6 | 0 | 5.989805  | -2.249637 | 2.083001  |
| 56 | 6 | 0 | 5.753658  | -0.430677 | 0.404494  |
| 57 | 1 | 0 | 3.309178  | -3.368495 | 2.148520  |
| 58 | 1 | 0 | 3.424802  | -2.156276 | 3.445316  |
| 59 | 1 | 0 | 1.987904  | -2.232968 | 2.425361  |
| 60 | 6 | 0 | 5.608198  | 1.377043  | -1.276142 |
| 61 | 1 | 0 | 5.213171  | 2.964234  | -2.732808 |
| 62 | 6 | 0 | 7.331748  | -2.234169 | 1.947717  |
| 63 | 1 | 0 | 5.513851  | -2.944631 | 2.775727  |
| 64 | 6 | 0 | 7.184376  | -0.415507 | 0.260435  |
| 65 | 6 | 0 | 6.985795  | 1.394131  | -1.416688 |
| 66 | 6 | 0 | 7.994898  | -1.316346 | 1.029531  |
| 67 | 1 | 0 | 7.967455  | -2.908873 | 2.521119  |
| 68 | 6 | 0 | 7.803984  | 0.488789  | -0.642191 |
| 69 | 6 | 0 | 7.641812  | 2.345679  | -2.368246 |
| 70 | 6 | 0 | 9.376658  | -1.302716 | 0.891612  |
| 71 | 6 | 0 | 9.222702  | 0.469760  | -0.753071 |
| 72 | 1 | 0 | 7.299609  | 2.177220  | -3.399998 |
| 73 | 1 | 0 | 7.418930  | 3.390085  | -2.104365 |
| 74 | 1 | 0 | 8.738881  | 2.253354  | -2.382958 |
| 75 | 6 | 0 | 9.988263  | -0.402388 | -0.006162 |
| 76 | 1 | 0 | 9.998301  | -1.982683 | 1.471304  |
| 77 | 1 | 0 | 9.703589  | 1.164059  | -1.446727 |
| 78 | 1 | 0 | 11.073341 | -0.404828 | -0.102334 |

---

**Table S6.** Cartesian coordinates of 6,12-methyl 2,2'-bianthanthrenyl (dihedral angle = 120°).

SCF Done: E(RPM6) = 0.236685025642 A.U. after 19 cycles

| Center<br>Number | Atomic<br>Number | Atomic<br>Type | Coordinates (Angstroms) |           |           |
|------------------|------------------|----------------|-------------------------|-----------|-----------|
|                  |                  |                | X                       | Y         | Z         |
| 1                | 6                | 0              | 3.553558                | 2.736688  | -1.333434 |
| 2                | 6                | 0              | 4.901909                | 2.752407  | -1.366265 |
| 3                | 6                | 0              | 5.707181                | 1.657717  | -0.828086 |
| 4                | 6                | 0              | 5.000818                | 0.534381  | -0.247583 |
| 5                | 6                | 0              | 3.563722                | 0.516786  | -0.216481 |
| 6                | 6                | 0              | 2.817786                | 1.616879  | -0.757582 |
| 7                | 6                | 0              | 7.091524                | 1.676170  | -0.861510 |
| 8                | 6                | 0              | 5.714871                | -0.547162 | 0.290968  |
| 9                | 6                | 0              | 7.152460                | -0.530545 | 0.258232  |
| 10               | 6                | 0              | 7.843667                | 0.570347  | -0.313686 |
| 11               | 6                | 0              | 7.897383                | -1.628524 | 0.805034  |
| 12               | 6                | 0              | 7.161503                | -2.744177 | 1.387634  |
| 13               | 6                | 0              | 5.813103                | -2.760007 | 1.420051  |
| 14               | 6                | 0              | 5.008217                | -1.667894 | 0.875800  |
| 15               | 6                | 0              | 3.623838                | -1.686323 | 0.909652  |
| 16               | 6                | 0              | 2.871910                | -0.583755 | 0.354396  |
| 17               | 1                | 0              | 2.966342                | 3.560649  | -1.738887 |
| 18               | 1                | 0              | 5.432287                | 3.599532  | -1.803178 |
| 19               | 1                | 0              | 7.748223                | -3.566257 | 1.797355  |
| 20               | 1                | 0              | 5.282310                | -3.604358 | 1.861515  |
| 21               | 6                | 0              | 9.266542                | 0.544911  | -0.325626 |
| 22               | 6                | 0              | 9.968524                | -0.518845 | 0.203519  |
| 23               | 1                | 0              | 11.057753               | -0.523417 | 0.186972  |
| 24               | 6                | 0              | 9.285714                | -1.614242 | 0.773450  |
| 25               | 1                | 0              | 9.857901                | -2.443126 | 1.185993  |
| 26               | 6                | 0              | 1.431001                | 1.605545  | -0.726649 |
| 27               | 6                | 0              | 0.741846                | 0.495272  | -0.180117 |
| 28               | 6                | 0              | 1.450512                | -0.563453 | 0.362430  |
| 29               | 1                | 0              | 0.858115                | 2.439034  | -1.131234 |

|    |   |   |           |           |           |
|----|---|---|-----------|-----------|-----------|
| 30 | 1 | 0 | 0.914652  | -1.404385 | 0.811829  |
| 31 | 1 | 0 | 9.802466  | 1.390161  | -0.765005 |
| 32 | 6 | 0 | 7.823101  | 2.836301  | -1.461991 |
| 33 | 1 | 0 | 7.558847  | 2.968900  | -2.521567 |
| 34 | 1 | 0 | 7.586998  | 3.772426  | -0.934817 |
| 35 | 1 | 0 | 8.917617  | 2.722843  | -1.423838 |
| 36 | 6 | 0 | 2.892083  | -2.842069 | 1.518055  |
| 37 | 1 | 0 | 3.116436  | -3.779551 | 0.988709  |
| 38 | 1 | 0 | 3.166471  | -2.975958 | 2.574933  |
| 39 | 1 | 0 | 1.797638  | -2.720931 | 1.493631  |
| 40 | 6 | 0 | -0.738761 | 0.518700  | -0.117819 |
| 41 | 6 | 0 | -1.478469 | -0.550014 | -0.596345 |
| 42 | 6 | 0 | -1.389548 | 1.607829  | 0.511253  |
| 43 | 6 | 0 | -2.897171 | -0.566788 | -0.507493 |
| 44 | 1 | 0 | -0.970575 | -1.397283 | -1.065799 |
| 45 | 6 | 0 | -2.772223 | 1.622466  | 0.621131  |
| 46 | 1 | 0 | -0.790648 | 2.427027  | 0.907359  |
| 47 | 6 | 0 | -3.682760 | -1.665786 | -1.022218 |
| 48 | 6 | 0 | -3.551814 | 0.531880  | 0.108684  |
| 49 | 6 | 0 | -3.469559 | 2.734236  | 1.256776  |
| 50 | 6 | 0 | -5.062893 | -1.643879 | -0.909738 |
| 51 | 6 | 0 | -2.990437 | -2.820438 | -1.676752 |
| 52 | 6 | 0 | -4.984445 | 0.550949  | 0.225513  |
| 53 | 6 | 0 | -4.813837 | 2.753716  | 1.365449  |
| 54 | 1 | 0 | -2.857062 | 3.550292  | 1.640485  |
| 55 | 6 | 0 | -5.900907 | -2.730638 | -1.413669 |
| 56 | 6 | 0 | -5.731485 | -0.525102 | -0.278618 |
| 57 | 1 | 0 | -3.187147 | -3.759948 | -1.139959 |
| 58 | 1 | 0 | -3.325014 | -2.948410 | -2.716942 |
| 59 | 1 | 0 | -1.896038 | -2.702149 | -1.714240 |
| 60 | 6 | 0 | -5.652508 | 1.668786  | 0.859117  |
| 61 | 1 | 0 | -5.315252 | 3.595723  | 1.844114  |
| 62 | 6 | 0 | -7.245188 | -2.711590 | -1.304336 |
| 63 | 1 | 0 | -5.398826 | -3.573547 | -1.889850 |
| 64 | 6 | 0 | -7.164651 | -0.506036 | -0.161982 |

|    |   |   |            |           |           |
|----|---|---|------------|-----------|-----------|
| 65 | 6 | 0 | -7.032496  | 1.689793  | 0.972940  |
| 66 | 6 | 0 | -7.943036  | -1.598329 | -0.672804 |
| 67 | 1 | 0 | -7.856902  | -3.529558 | -1.685042 |
| 68 | 6 | 0 | -7.818402  | 0.591305  | 0.458369  |
| 69 | 6 | 0 | -7.724481  | 2.844644  | 1.627626  |
| 70 | 6 | 0 | -9.327150  | -1.581295 | -0.560956 |
| 71 | 6 | 0 | -9.238246  | 0.568765  | 0.552460  |
| 72 | 1 | 0 | -7.398115  | 2.965399  | 2.671177  |
| 73 | 1 | 0 | -7.517287  | 3.785957  | 1.097455  |
| 74 | 1 | 0 | -8.819621  | 2.733463  | 1.652675  |
| 75 | 6 | 0 | -9.972715  | -0.489001 | 0.056029  |
| 76 | 1 | 0 | -9.924574  | -2.405796 | -0.945903 |
| 77 | 1 | 0 | -9.745387  | 1.411269  | 1.029384  |
| 78 | 1 | 0 | -11.059142 | -0.491486 | 0.135694  |

---

**Table S7.** Cartesian coordinates of 6,12-methyl 2,2'-bianthanthrenyl (dihedral angle = 180°).

SCF Done: E(RPM6) = 0.240077140934 A.U. after 10 cycles

---

| Center<br>Number | Atomic<br>Number | Atomic<br>Type | Coordinates (Angstroms) |           |           |
|------------------|------------------|----------------|-------------------------|-----------|-----------|
|                  |                  |                | X                       | Y         | Z         |
| 1                | 6                | 0              | -3.587416               | 3.074210  | 0.000002  |
| 2                | 6                | 0              | -4.936143               | 3.094177  | 0.000043  |
| 3                | 6                | 0              | -5.734255               | 1.869655  | -0.000039 |
| 4                | 6                | 0              | -5.019469               | 0.610373  | -0.000053 |
| 5                | 6                | 0              | -3.582807               | 0.591028  | -0.000104 |
| 6                | 6                | 0              | -2.843295               | 1.819683  | -0.000059 |
| 7                | 6                | 0              | -7.118842               | 1.890814  | -0.000078 |
| 8                | 6                | 0              | -5.723911               | -0.603201 | -0.000001 |
| 9                | 6                | 0              | -7.161628               | -0.584212 | 0.000075  |
| 10               | 6                | 0              | -7.861832               | 0.651101  | 0.000024  |
| 11               | 6                | 0              | -7.897138               | -1.816318 | 0.000200  |
| 12               | 6                | 0              | -7.151193               | -3.068752 | 0.000297  |
| 13               | 6                | 0              | -5.802466               | -3.087243 | 0.000192  |

|    |   |   |            |           |           |
|----|---|---|------------|-----------|-----------|
| 14 | 6 | 0 | -5.006542  | -1.861090 | -0.000017 |
| 15 | 6 | 0 | -3.621802  | -1.881608 | -0.000179 |
| 16 | 6 | 0 | -2.879028  | -0.640998 | -0.000170 |
| 17 | 1 | 0 | -3.006809  | 3.996390  | 0.000019  |
| 18 | 1 | 0 | -5.472666  | 4.043693  | 0.000161  |
| 19 | 1 | 0 | -7.730868  | -3.991738 | 0.000476  |
| 20 | 1 | 0 | -5.264812  | -4.035888 | 0.000287  |
| 21 | 6 | 0 | -9.284617  | 0.622886  | 0.000053  |
| 22 | 6 | 0 | -9.977702  | -0.570379 | 0.000152  |
| 23 | 1 | 0 | -11.067029 | -0.575229 | 0.000181  |
| 24 | 6 | 0 | -9.285715  | -1.799809 | 0.000238  |
| 25 | 1 | 0 | -9.851120  | -2.729803 | 0.000295  |
| 26 | 6 | 0 | -1.457376  | 1.803167  | -0.000070 |
| 27 | 6 | 0 | -0.741701  | 0.576996  | -0.000130 |
| 28 | 6 | 0 | -1.459063  | -0.612383 | -0.000203 |
| 29 | 1 | 0 | -0.902933  | 2.743609  | -0.000038 |
| 30 | 1 | 0 | -0.926984  | -1.570156 | -0.000286 |
| 31 | 1 | 0 | -9.827797  | 1.571214  | -0.000043 |
| 32 | 6 | 0 | -7.859923  | 3.191347  | -0.000001 |
| 33 | 1 | 0 | -7.616100  | 3.788738  | 0.890751  |
| 34 | 1 | 0 | -7.612036  | 3.791478  | -0.887770 |
| 35 | 1 | 0 | -8.953650  | 3.064872  | -0.002785 |
| 36 | 6 | 0 | -2.881161  | -3.182710 | -0.000265 |
| 37 | 1 | 0 | -3.126532  | -3.780168 | 0.890045  |
| 38 | 1 | 0 | -3.129045  | -3.781630 | -0.888880 |
| 39 | 1 | 0 | -1.787843  | -3.055747 | -0.001924 |
| 40 | 6 | 0 | 0.741704   | 0.576998  | -0.000151 |
| 41 | 6 | 0 | 1.459078   | -0.612378 | -0.000234 |
| 42 | 6 | 0 | 1.457369   | 1.803169  | -0.000033 |
| 43 | 6 | 0 | 2.879036   | -0.640997 | -0.000178 |
| 44 | 1 | 0 | 0.926979   | -1.570147 | -0.000396 |
| 45 | 6 | 0 | 2.843294   | 1.819681  | 0.000013  |
| 46 | 1 | 0 | 0.902948   | 2.743619  | 0.000013  |
| 47 | 6 | 0 | 3.621802   | -1.881611 | -0.000220 |
| 48 | 6 | 0 | 3.582809   | 0.591032  | -0.000083 |

|    |   |   |           |           |           |
|----|---|---|-----------|-----------|-----------|
| 49 | 6 | 0 | 3.587418  | 3.074205  | 0.000152  |
| 50 | 6 | 0 | 5.006541  | -1.861088 | -0.000103 |
| 51 | 6 | 0 | 2.881149  | -3.182709 | -0.000219 |
| 52 | 6 | 0 | 5.019472  | 0.610379  | -0.000053 |
| 53 | 6 | 0 | 4.936145  | 3.094174  | 0.000119  |
| 54 | 1 | 0 | 3.006810  | 3.996385  | 0.000291  |
| 55 | 6 | 0 | 5.802468  | -3.087236 | 0.000018  |
| 56 | 6 | 0 | 5.723910  | -0.603200 | -0.000048 |
| 57 | 1 | 0 | 3.129407  | -3.781948 | -0.888513 |
| 58 | 1 | 0 | 3.126129  | -3.779849 | 0.890416  |
| 59 | 1 | 0 | 1.787834  | -3.055732 | -0.002447 |
| 60 | 6 | 0 | 5.734258  | 1.869653  | -0.000017 |
| 61 | 1 | 0 | 5.472661  | 4.043695  | 0.000211  |
| 62 | 6 | 0 | 7.151191  | -3.068747 | 0.000133  |
| 63 | 1 | 0 | 5.264815  | -4.035884 | 0.000024  |
| 64 | 6 | 0 | 7.161620  | -0.584213 | 0.000032  |
| 65 | 6 | 0 | 7.118850  | 1.890806  | -0.000063 |
| 66 | 6 | 0 | 7.897136  | -1.816318 | 0.000143  |
| 67 | 1 | 0 | 7.730866  | -3.991733 | 0.000219  |
| 68 | 6 | 0 | 7.861825  | 0.651093  | 0.000027  |
| 69 | 6 | 0 | 7.859942  | 3.191341  | 0.000010  |
| 70 | 6 | 0 | 9.285701  | -1.799812 | 0.000259  |
| 71 | 6 | 0 | 9.284612  | 0.622878  | 0.000125  |
| 72 | 1 | 0 | 7.612075  | 3.791476  | -0.887753 |
| 73 | 1 | 0 | 7.616113  | 3.788732  | 0.890770  |
| 74 | 1 | 0 | 8.953669  | 3.064861  | -0.002776 |
| 75 | 6 | 0 | 9.977693  | -0.570379 | 0.000245  |
| 76 | 1 | 0 | 9.851113  | -2.729801 | 0.000367  |
| 77 | 1 | 0 | 9.827782  | 1.571209  | 0.000093  |
| 78 | 1 | 0 | 11.067019 | -0.575244 | 0.000316  |

---

**Table S8.** Cartesian coordinates of 6,12-TMSe 2,2'-bianthanthrenyl (dihedral angle = 0°).

SCF Done: E(RPM6) = 0.319105292949 A.U. after 26 cycles

| Center<br>Number | Atomic<br>Number | Atomic<br>Type | Coordinates (Angstroms) |           |           |
|------------------|------------------|----------------|-------------------------|-----------|-----------|
|                  |                  |                | X                       | Y         | Z         |
| 1                | 6                | 0              | 4.042073                | 1.684567  | 0.166965  |
| 2                | 6                | 0              | 5.364286                | 1.414797  | 0.167191  |
| 3                | 6                | 0              | 5.874201                | 0.047879  | 0.097295  |
| 4                | 6                | 0              | 4.911223                | -1.028791 | 0.026683  |
| 5                | 6                | 0              | 3.505153                | -0.735901 | 0.024021  |
| 6                | 6                | 0              | 3.046116                | 0.620103  | 0.093846  |
| 7                | 6                | 0              | 7.233996                | -0.234017 | 0.098694  |
| 8                | 6                | 0              | 5.344642                | -2.363267 | -0.038050 |
| 9                | 6                | 0              | 6.751697                | -2.656320 | -0.036338 |
| 10               | 6                | 0              | 7.700603                | -1.602918 | 0.030860  |
| 11               | 6                | 0              | 7.204916                | -4.015770 | -0.102153 |
| 12               | 6                | 0              | 6.207326                | -5.077901 | -0.169223 |
| 13               | 6                | 0              | 4.885474                | -4.806651 | -0.170059 |
| 14               | 6                | 0              | 4.379217                | -3.438433 | -0.104785 |
| 15               | 6                | 0              | 3.019789                | -3.155940 | -0.105111 |
| 16               | 6                | 0              | 2.554076                | -1.785474 | -0.041186 |
| 17               | 1                | 0              | 3.672057                | 2.709092  | 0.220099  |
| 18               | 1                | 0              | 6.104590                | 2.217197  | 0.221101  |
| 19               | 1                | 0              | 6.575197                | -6.102936 | -0.218350 |
| 20               | 1                | 0              | 4.143443                | -5.607555 | -0.220091 |
| 21               | 6                | 0              | 9.085439                | -1.924470 | 0.030582  |
| 22               | 6                | 0              | 9.504318                | -3.239289 | -0.033879 |
| 23               | 1                | 0              | 10.567559               | -3.477350 | -0.033594 |
| 24               | 6                | 0              | 8.566597                | -4.291783 | -0.100459 |
| 25               | 1                | 0              | 8.922456                | -5.319426 | -0.150119 |
| 26               | 6                | 0              | 1.686713                | 0.894792  | 0.092944  |
| 27               | 6                | 0              | 0.727047                | -0.149215 | 0.007218  |
| 28               | 6                | 0              | 1.172506                | -1.465418 | -0.040123 |
| 29               | 1                | 0              | 1.342374                | 1.930375  | 0.154312  |



|    |    |   |           |           |           |
|----|----|---|-----------|-----------|-----------|
| 30 | 1  | 0 | 0.449503  | -2.286732 | -0.082532 |
| 31 | 1  | 0 | 9.816677  | -1.115593 | 0.082331  |
| 32 | 6  | 0 | 2.055048  | -4.193659 | -0.168937 |
| 33 | 6  | 0 | 1.215000  | -5.069965 | -0.222756 |
| 34 | 6  | 0 | 8.192859  | 0.809249  | 0.166968  |
| 35 | 6  | 0 | 9.015029  | 1.702104  | 0.225287  |
| 36 | 14 | 0 | -0.071981 | -6.353033 | -0.301881 |
| 37 | 14 | 0 | 10.250338 | 3.035274  | 0.312306  |
| 38 | 6  | 0 | 0.119712  | -7.465076 | 1.180024  |
| 39 | 1  | 0 | -0.645140 | -8.255635 | 1.189921  |
| 40 | 1  | 0 | 1.107284  | -7.951610 | 1.186113  |
| 41 | 1  | 0 | 0.024842  | -6.892510 | 2.116430  |
| 42 | 6  | 0 | 0.152505  | -7.309041 | -1.884609 |
| 43 | 1  | 0 | -0.614360 | -8.090133 | -1.993675 |
| 44 | 1  | 0 | 0.082381  | -6.643343 | -2.759623 |
| 45 | 1  | 0 | 1.138398  | -7.797950 | -1.916640 |
| 46 | 6  | 0 | -1.727061 | -5.493097 | -0.275848 |
| 47 | 1  | 0 | -1.849786 | -4.901811 | 0.644505  |
| 48 | 1  | 0 | -1.831663 | -4.812950 | -1.135030 |
| 49 | 1  | 0 | -2.550908 | -6.220995 | -0.320605 |
| 50 | 6  | 0 | 9.974461  | 3.976676  | 1.895985  |
| 51 | 1  | 0 | 10.704115 | 4.792207  | 2.008821  |
| 52 | 1  | 0 | 8.967014  | 4.419371  | 1.925186  |
| 53 | 1  | 0 | 10.072412 | 3.313421  | 2.770066  |
| 54 | 6  | 0 | 10.012710 | 4.141198  | -1.167855 |
| 55 | 1  | 0 | 10.743498 | 4.963466  | -1.174221 |
| 56 | 1  | 0 | 10.133823 | 3.575331  | -2.105210 |
| 57 | 1  | 0 | 9.005519  | 4.585383  | -1.174864 |
| 58 | 6  | 0 | 11.942480 | 2.255541  | 0.291596  |
| 59 | 1  | 0 | 12.075627 | 1.576176  | 1.147791  |
| 60 | 1  | 0 | 12.097663 | 1.671208  | -0.628621 |
| 61 | 1  | 0 | 12.733021 | 3.019096  | 0.342255  |
| 62 | 6  | 0 | -0.721976 | 0.164742  | 0.052976  |
| 63 | 6  | 0 | -1.678877 | -0.884046 | 0.099605  |
| 64 | 6  | 0 | -1.171770 | 1.477967  | -0.028147 |

|    |    |   |           |           |           |
|----|----|---|-----------|-----------|-----------|
| 65 | 6  | 0 | -3.039100 | -0.613446 | 0.101177  |
| 66 | 1  | 0 | -1.331623 | -1.919610 | 0.139504  |
| 67 | 6  | 0 | -2.554301 | 1.793849  | -0.028909 |
| 68 | 1  | 0 | -0.451450 | 2.300580  | -0.089021 |
| 69 | 6  | 0 | -4.031939 | -1.681446 | 0.163408  |
| 70 | 6  | 0 | -3.502169 | 0.741508  | 0.038598  |
| 71 | 6  | 0 | -3.024226 | 3.162612  | -0.098740 |
| 72 | 6  | 0 | -5.354946 | -1.415601 | 0.165355  |
| 73 | 1  | 0 | -3.658891 | -2.705169 | 0.209776  |
| 74 | 6  | 0 | -4.909158 | 1.029961  | 0.037632  |
| 75 | 6  | 0 | -4.384493 | 3.441035  | -0.097351 |
| 76 | 6  | 0 | -2.062676 | 4.203049  | -0.166732 |
| 77 | 6  | 0 | -5.868924 | -0.049878 | 0.102892  |
| 78 | 1  | 0 | -6.092878 | -2.220531 | 0.213235  |
| 79 | 6  | 0 | -5.346631 | 2.363059  | -0.028320 |
| 80 | 6  | 0 | -4.894915 | 4.807615  | -0.164643 |
| 81 | 6  | 0 | -1.225340 | 5.081706  | -0.224691 |
| 82 | 6  | 0 | -7.229578 | 0.227846  | 0.103281  |
| 83 | 6  | 0 | -6.754586 | 2.651764  | -0.028318 |
| 84 | 6  | 0 | -6.217578 | 5.074875  | -0.163436 |
| 85 | 1  | 0 | -4.155331 | 5.610686  | -0.216284 |
| 86 | 14 | 0 | 0.057601  | 6.368415  | -0.310669 |
| 87 | 6  | 0 | -7.700309 | 1.595429  | 0.037571  |
| 88 | 6  | 0 | -8.185320 | -0.818526 | 0.167251  |
| 89 | 6  | 0 | -7.211935 | 4.009774  | -0.095358 |
| 90 | 1  | 0 | -6.588568 | 6.098727  | -0.213877 |
| 91 | 6  | 0 | -0.135715 | 7.486005  | 1.166882  |
| 92 | 6  | 0 | -0.171729 | 7.317188  | -1.897101 |
| 93 | 6  | 0 | 1.715347  | 5.513676  | -0.282969 |
| 94 | 6  | 0 | -9.086127 | 1.912723  | 0.036055  |
| 95 | 6  | 0 | -9.004780 | -1.714067 | 0.222147  |
| 96 | 6  | 0 | -8.574456 | 4.281615  | -0.094581 |
| 97 | 1  | 0 | 0.626724  | 8.278956  | 1.172593  |
| 98 | 1  | 0 | -1.124766 | 7.969537  | 1.172142  |
| 99 | 1  | 0 | -0.037967 | 6.917600  | 2.105553  |

|     |    |   |            |           |           |
|-----|----|---|------------|-----------|-----------|
| 100 | 1  | 0 | 0.592598   | 8.100198  | -2.010318 |
| 101 | 1  | 0 | -0.100608  | 6.648083  | -2.769455 |
| 102 | 1  | 0 | -1.159161  | 7.802927  | -1.929973 |
| 103 | 1  | 0 | 1.840953   | 4.926593  | 0.639713  |
| 104 | 1  | 0 | 1.821043   | 4.830272  | -1.139451 |
| 105 | 1  | 0 | 2.536902   | 6.243928  | -0.331706 |
| 106 | 6  | 0 | -9.508988  | 3.226264  | -0.028421 |
| 107 | 1  | 0 | -9.814922  | 1.101575  | 0.086572  |
| 108 | 14 | 0 | -10.235886 | -3.051394 | 0.304356  |
| 109 | 1  | 0 | -8.933436  | 5.308137  | -0.145034 |
| 110 | 1  | 0 | -10.572956 | 3.461054  | -0.029144 |
| 111 | 6  | 0 | -9.959001  | -3.995699 | 1.886113  |
| 112 | 6  | 0 | -9.992802  | -4.152972 | -1.178122 |
| 113 | 6  | 0 | -11.930506 | -2.277068 | 0.283265  |
| 114 | 1  | 0 | -10.686163 | -4.813832 | 1.996040  |
| 115 | 1  | 0 | -8.950171  | -4.435217 | 1.915565  |
| 116 | 1  | 0 | -10.060210 | -3.334875 | 2.761641  |
| 117 | 1  | 0 | -10.720924 | -4.977558 | -1.187413 |
| 118 | 1  | 0 | -10.114539 | -3.585251 | -2.114263 |
| 119 | 1  | 0 | -8.984176  | -4.593894 | -1.184884 |
| 120 | 1  | 0 | -12.066955 | -1.600187 | 1.140886  |
| 121 | 1  | 0 | -12.086381 | -1.691050 | -0.635752 |
| 122 | 1  | 0 | -12.718642 | -3.043271 | 0.331063  |

**Table S9.** Cartesian coordinates of 6,12-TMSe 2,2'-bianthanthrenyl (dihedral angle = 60°).

SCF Done: E(RPM6) = 0.316313373964 A.U. after 20 cycles

| Center<br>Number | Atomic<br>Number | Atomic<br>Type | Coordinates (Angstroms) |           |          |
|------------------|------------------|----------------|-------------------------|-----------|----------|
|                  |                  |                | X                       | Y         | Z        |
| 1                | 6                | 0              | 3.889899                | 1.529165  | 1.693738 |
| 2                | 6                | 0              | 5.222564                | 1.318444  | 1.705192 |
| 3                | 6                | 0              | 5.830521                | 0.186266  | 1.011612 |
| 4                | 6                | 0              | 4.955624                | -0.719860 | 0.300575 |

|    |    |   |           |           |           |
|----|----|---|-----------|-----------|-----------|
| 5  | 6  | 0 | 3.536994  | -0.490790 | 0.289204  |
| 6  | 6  | 0 | 2.981927  | 0.635021  | 0.983150  |
| 7  | 6  | 0 | 7.201717  | -0.033517 | 1.022788  |
| 8  | 6  | 0 | 5.488556  | -1.827327 | -0.379503 |
| 9  | 6  | 0 | 6.907694  | -2.056253 | -0.368880 |
| 10 | 6  | 0 | 7.769536  | -1.168294 | 0.326165  |
| 11 | 6  | 0 | 7.461641  | -3.184263 | -1.060611 |
| 12 | 6  | 0 | 6.552877  | -4.081149 | -1.765697 |
| 13 | 6  | 0 | 5.220182  | -3.870091 | -1.777097 |
| 14 | 6  | 0 | 4.613045  | -2.735198 | -1.087166 |
| 15 | 6  | 0 | 3.241485  | -2.516483 | -1.097126 |
| 16 | 6  | 0 | 2.673888  | -1.379773 | -0.402549 |
| 17 | 1  | 0 | 3.445190  | 2.376738  | 2.215754  |
| 18 | 1  | 0 | 5.896883  | 1.992828  | 2.239354  |
| 19 | 1  | 0 | 6.996183  | -4.931463 | -2.284033 |
| 20 | 1  | 0 | 4.545028  | -4.546792 | -2.307326 |
| 21 | 6  | 0 | 9.168609  | -1.420687 | 0.318620  |
| 22 | 6  | 0 | 9.684802  | -2.511656 | -0.353319 |
| 23 | 1  | 0 | 10.758255 | -2.698281 | -0.354324 |
| 24 | 6  | 0 | 8.834273  | -3.399173 | -1.046322 |
| 25 | 1  | 0 | 9.265664  | -4.251791 | -1.567797 |
| 26 | 6  | 0 | 1.611257  | 0.852206  | 0.970880  |
| 27 | 6  | 0 | 0.754918  | -0.028348 | 0.265005  |
| 28 | 6  | 0 | 1.275731  | -1.132349 | -0.392291 |
| 29 | 1  | 0 | 1.178332  | 1.699031  | 1.502984  |
| 30 | 1  | 0 | 0.610547  | -1.819307 | -0.920781 |
| 31 | 1  | 0 | 9.832468  | -0.738558 | 0.853032  |
| 32 | 6  | 0 | 2.370739  | -3.398047 | -1.787416 |
| 33 | 6  | 0 | 1.626534  | -4.153922 | -2.380179 |
| 34 | 6  | 0 | 8.073548  | 0.845536  | 1.715423  |
| 35 | 6  | 0 | 8.821018  | 1.597899  | 2.308577  |
| 36 | 14 | 0 | 0.508315  | -5.281605 | -3.269369 |
| 37 | 14 | 0 | 9.943605  | 2.721503  | 3.196179  |
| 38 | 6  | 0 | 1.332019  | -6.950642 | -3.367929 |
| 39 | 1  | 0 | 0.689472  | -7.680582 | -3.882476 |

|    |   |   |           |           |           |
|----|---|---|-----------|-----------|-----------|
| 40 | 1 | 0 | 2.283110  | -6.892401 | -3.918545 |
| 41 | 1 | 0 | 1.549287  | -7.343089 | -2.362277 |
| 42 | 6 | 0 | 0.218231  | -4.583315 | -4.971310 |
| 43 | 1 | 0 | -0.452670 | -5.226242 | -5.560019 |
| 44 | 1 | 0 | -0.240274 | -3.583147 | -4.912420 |
| 45 | 1 | 0 | 1.163654  | -4.483275 | -5.526639 |
| 46 | 6 | 0 | -1.086711 | -5.385215 | -2.313123 |
| 47 | 1 | 0 | -0.913895 | -5.759904 | -1.292366 |
| 48 | 1 | 0 | -1.562108 | -4.394879 | -2.230222 |
| 49 | 1 | 0 | -1.803605 | -6.060567 | -2.803348 |
| 50 | 6 | 0 | 9.464340  | 2.714888  | 4.996206  |
| 51 | 1 | 0 | 10.119716 | 3.371682  | 5.587257  |
| 52 | 1 | 0 | 8.428342  | 3.061217  | 5.132991  |
| 53 | 1 | 0 | 9.534739  | 1.699934  | 5.418546  |
| 54 | 6 | 0 | 9.754560  | 4.424487  | 2.464949  |
| 55 | 1 | 0 | 10.421397 | 5.147461  | 2.957767  |
| 56 | 1 | 0 | 9.996553  | 4.420592  | 1.390391  |
| 57 | 1 | 0 | 8.722013  | 4.790698  | 2.572613  |
| 58 | 6 | 0 | 11.683733 | 2.094047  | 2.971987  |
| 59 | 1 | 0 | 11.791525 | 1.074889  | 3.374486  |
| 60 | 1 | 0 | 11.960022 | 2.065857  | 1.906608  |
| 61 | 1 | 0 | 12.409004 | 2.738727  | 3.490539  |
| 62 | 6 | 0 | -0.709600 | 0.195753  | 0.312383  |
| 63 | 6 | 0 | -1.533672 | -0.758147 | 0.958388  |
| 64 | 6 | 0 | -1.274383 | 1.285775  | -0.332275 |
| 65 | 6 | 0 | -2.910790 | -0.588042 | 0.986112  |
| 66 | 1 | 0 | -1.070196 | -1.618539 | 1.440707  |
| 67 | 6 | 0 | -2.680122 | 1.485777  | -0.326043 |
| 68 | 1 | 0 | -0.637876 | 2.003432  | -0.855403 |
| 69 | 6 | 0 | -3.784054 | -1.542472 | 1.660767  |
| 70 | 6 | 0 | -3.507760 | 0.545490  | 0.340875  |
| 71 | 6 | 0 | -3.291049 | 2.622878  | -0.982513 |
| 72 | 6 | 0 | -5.122864 | -1.376912 | 1.688118  |
| 73 | 1 | 0 | -3.307941 | -2.395599 | 2.144827  |
| 74 | 6 | 0 | -4.933540 | 0.723646  | 0.364761  |

|     |    |   |           |           |           |
|-----|----|---|-----------|-----------|-----------|
| 75  | 6  | 0 | -4.669066 | 2.794773  | -0.956673 |
| 76  | 6  | 0 | -2.455676 | 3.554934  | -1.649828 |
| 77  | 6  | 0 | -5.772873 | -0.238767 | 1.043948  |
| 78  | 1  | 0 | -5.770849 | -2.095210 | 2.196968  |
| 79  | 6  | 0 | -5.508357 | 1.834686  | -0.274465 |
| 80  | 6  | 0 | -5.319117 | 3.930592  | -1.605059 |
| 81  | 6  | 0 | -1.741843 | 4.353744  | -2.223352 |
| 82  | 6  | 0 | -7.150725 | -0.066888 | 1.069271  |
| 83  | 6  | 0 | -6.934487 | 2.013711  | -0.249696 |
| 84  | 6  | 0 | -6.658077 | 4.095763  | -1.578856 |
| 85  | 1  | 0 | -4.670992 | 4.647124  | -2.116351 |
| 86  | 14 | 0 | -0.669531 | 5.545684  | -3.084890 |
| 87  | 6  | 0 | -7.761164 | 1.072558  | 0.417487  |
| 88  | 6  | 0 | -7.987949 | -1.000975 | 1.731870  |
| 89  | 6  | 0 | -7.531092 | 3.144953  | -0.899739 |
| 90  | 1  | 0 | -7.133536 | 4.947308  | -2.065976 |
| 91  | 6  | 0 | -1.554256 | 7.185550  | -3.135098 |
| 92  | 6  | 0 | -0.361300 | 4.905087  | -4.806299 |
| 93  | 6  | 0 | 0.924710  | 5.681811  | -2.131038 |
| 94  | 6  | 0 | -9.168127 | 1.276605  | 0.425232  |
| 95  | 6  | 0 | -8.705783 | -1.800343 | 2.299561  |
| 96  | 6  | 0 | -8.910172 | 3.311859  | -0.871359 |
| 97  | 1  | 0 | -0.941221 | 7.952306  | -3.631856 |
| 98  | 1  | 0 | -2.505113 | 7.107363  | -3.683865 |
| 99  | 1  | 0 | -1.781098 | 7.542423  | -2.118337 |
| 100 | 1  | 0 | 0.283073  | 5.588079  | -5.379331 |
| 101 | 1  | 0 | 0.133782  | 3.921112  | -4.776189 |
| 102 | 1  | 0 | -1.304788 | 4.785539  | -5.361288 |
| 103 | 1  | 0 | 0.742559  | 6.021748  | -1.099743 |
| 104 | 1  | 0 | 1.436555  | 4.707689  | -2.076929 |
| 105 | 1  | 0 | 1.614178  | 6.396404  | -2.604704 |
| 106 | 6  | 0 | -9.725504 | 2.372068  | -0.205495 |
| 107 | 1  | 0 | -9.804977 | 0.553417  | 0.938076  |
| 108 | 14 | 0 | -9.784085 | -2.994276 | 3.149395  |
| 109 | 1  | 0 | -9.373786 | 4.166500  | -1.361140 |

|     |   |   |            |           |           |
|-----|---|---|------------|-----------|-----------|
| 110 | 1 | 0 | -10.804736 | 2.521421  | -0.195072 |
| 111 | 6 | 0 | -9.295072  | -3.038033 | 4.946431  |
| 112 | 6 | 0 | -9.540878  | -4.661473 | 2.354311  |
| 113 | 6 | 0 | -11.545996 | -2.419333 | 2.956050  |
| 114 | 1 | 0 | -9.924117  | -3.738602 | 5.515379  |
| 115 | 1 | 0 | -8.247013  | -3.353271 | 5.065768  |
| 116 | 1 | 0 | -9.397866  | -2.042459 | 5.406670  |
| 117 | 1 | 0 | -10.179735 | -5.424845 | 2.822645  |
| 118 | 1 | 0 | -9.788964  | -4.625973 | 1.281637  |
| 119 | 1 | 0 | -8.495783  | -4.995674 | 2.443865  |
| 120 | 1 | 0 | -11.686518 | -1.420114 | 3.396744  |
| 121 | 1 | 0 | -11.829052 | -2.361137 | 1.893573  |
| 122 | 1 | 0 | -12.245761 | -3.107540 | 3.453222  |

**Table S10.** Cartesian coordinates of 6,12-TMSe 2,2'-bianthanthrenyl (dihedral angle = 90°).

SCF Done: E(RPM6) = 0.316535703812 A.U. after 38 cycles

| Center<br>Number | Atomic<br>Number | Atomic<br>Type | Coordinates (Angstroms) |           |           |
|------------------|------------------|----------------|-------------------------|-----------|-----------|
|                  |                  |                | X                       | Y         | Z         |
| 1                | 6                | 0              | -3.776935               | -2.135946 | -1.507677 |
| 2                | 6                | 0              | -5.116240               | -2.166768 | -1.347014 |
| 3                | 6                | 0              | -5.793712               | -1.333899 | -0.357174 |
| 4                | 6                | 0              | -4.981632               | -0.460114 | 0.460838  |
| 5                | 6                | 0              | -3.555678               | -0.427973 | 0.284694  |
| 6                | 6                | 0              | -2.931277               | -1.263691 | -0.699808 |
| 7                | 6                | 0              | -7.171856               | -1.365057 | -0.188788 |
| 8                | 6                | 0              | -5.582982               | 0.358605  | 1.430895  |
| 9                | 6                | 0              | -7.009424               | 0.327227  | 1.606783  |
| 10               | 6                | 0              | -7.809698               | -0.527345 | 0.804567  |
| 11               | 6                | 0              | -7.632906               | 1.159369  | 2.594937  |
| 12               | 6                | 0              | -6.786500               | 2.026761  | 3.406468  |
| 13               | 6                | 0              | -5.447198               | 2.058187  | 3.244996  |
| 14               | 6                | 0              | -4.770454               | 1.229182  | 2.251404  |

|    |    |   |            |           |           |
|----|----|---|------------|-----------|-----------|
| 15 | 6  | 0 | -3.391941  | 1.259918  | 2.083797  |
| 16 | 6  | 0 | -2.754588  | 0.425147  | 1.087267  |
| 17 | 1  | 0 | -3.280053  | -2.761994 | -2.249164 |
| 18 | 1  | 0 | -5.743748  | -2.822127 | -1.956581 |
| 19 | 1  | 0 | -7.282042  | 2.649719  | 4.151118  |
| 20 | 1  | 0 | -4.818930  | 2.710339  | 3.857337  |
| 21 | 6  | 0 | -9.217642  | -0.536351 | 1.001423  |
| 22 | 6  | 0 | -9.801231  | 0.272236  | 1.957318  |
| 23 | 1  | 0 | -10.881046 | 0.259537  | 2.102160  |
| 24 | 6  | 0 | -9.012181  | 1.124146  | 2.759135  |
| 25 | 1  | 0 | -9.496039  | 1.751250  | 3.505817  |
| 26 | 6  | 0 | -1.553527  | -1.232347 | -0.864775 |
| 27 | 6  | 0 | -0.761852  | -0.364013 | -0.074811 |
| 28 | 6  | 0 | -1.347481  | 0.434980  | 0.893240  |
| 29 | 1  | 0 | -1.066460  | -1.867433 | -1.604062 |
| 30 | 1  | 0 | -0.728256  | 1.085886  | 1.514895  |
| 31 | 1  | 0 | -9.834165  | -1.193334 | 0.385097  |
| 32 | 6  | 0 | -2.582427  | 2.107489  | 2.882631  |
| 33 | 6  | 0 | -1.891195  | 2.833975  | 3.568889  |
| 34 | 6  | 0 | -7.982548  | -2.216077 | -0.983194 |
| 35 | 6  | 0 | -8.677617  | -2.944737 | -1.663285 |
| 36 | 14 | 0 | -0.852022  | 3.919789  | 4.595894  |
| 37 | 14 | 0 | -9.721608  | -4.034605 | -2.679484 |
| 38 | 6  | 0 | -1.930531  | 4.659088  | 5.924346  |
| 39 | 1  | 0 | -1.349701  | 5.322413  | 6.582484  |
| 40 | 1  | 0 | -2.748728  | 5.251186  | 5.486959  |
| 41 | 1  | 0 | -2.380408  | 3.873346  | 6.550648  |
| 42 | 6  | 0 | -0.145706  | 5.248838  | 3.499101  |
| 43 | 1  | 0 | 0.490772   | 5.942451  | 4.068195  |
| 44 | 1  | 0 | 0.468893   | 4.810700  | 2.696415  |
| 45 | 1  | 0 | -0.944973  | 5.837297  | 3.022462  |
| 46 | 6  | 0 | 0.503380   | 2.883740  | 5.342405  |
| 47 | 1  | 0 | 0.088133   | 2.068702  | 5.955520  |
| 48 | 1  | 0 | 1.127025   | 2.426054  | 4.557942  |
| 49 | 1  | 0 | 1.162007   | 3.487057  | 5.984574  |



|    |   |   |            |           |           |
|----|---|---|------------|-----------|-----------|
| 50 | 6 | 0 | -9.178320  | -5.792366 | -2.387896 |
| 51 | 1 | 0 | -9.785588  | -6.500714 | -2.970733 |
| 52 | 1 | 0 | -8.125240  | -5.935600 | -2.675034 |
| 53 | 1 | 0 | -9.273343  | -6.062476 | -1.324232 |
| 54 | 6 | 0 | -9.491198  | -3.555951 | -4.464997 |
| 55 | 1 | 0 | -10.109921 | -4.177838 | -5.128822 |
| 56 | 1 | 0 | -9.772158  | -2.503772 | -4.629985 |
| 57 | 1 | 0 | -8.441474  | -3.672940 | -4.775379 |
| 58 | 6 | 0 | -11.492429 | -3.792907 | -2.152341 |
| 59 | 1 | 0 | -11.626298 | -4.044531 | -1.088849 |
| 60 | 1 | 0 | -11.807849 | -2.747502 | -2.292928 |
| 61 | 1 | 0 | -12.172122 | -4.430743 | -2.736891 |
| 62 | 6 | 0 | 0.712943   | -0.389455 | -0.237365 |
| 63 | 6 | 0 | 1.462788   | -1.365943 | 0.461442  |
| 64 | 6 | 0 | 1.351344   | 0.573656  | -1.001694 |
| 65 | 6 | 0 | 2.846573   | -1.389126 | 0.356321  |
| 66 | 1 | 0 | 0.938223   | -2.096887 | 1.076159  |
| 67 | 6 | 0 | 2.766004   | 0.576212  | -1.130277 |
| 68 | 1 | 0 | 0.767902   | 1.339780  | -1.517804 |
| 69 | 6 | 0 | 3.647829   | -2.390467 | 1.051838  |
| 70 | 6 | 0 | 3.522148   | -0.412791 | -0.449109 |
| 71 | 6 | 0 | 3.456056   | 1.561317  | -1.936686 |
| 72 | 6 | 0 | 4.992939   | -2.413956 | 0.948438  |
| 73 | 1 | 0 | 3.112566   | -3.121239 | 1.658830  |
| 74 | 6 | 0 | 4.954924   | -0.433027 | -0.559784 |
| 75 | 6 | 0 | 4.840705   | 1.538820  | -2.044591 |
| 76 | 6 | 0 | 2.691424   | 2.545439  | -2.613950 |
| 77 | 6 | 0 | 5.721736   | -1.440478 | 0.139572  |
| 78 | 1 | 0 | 5.586825   | -3.167924 | 1.471502  |
| 79 | 6 | 0 | 5.607298   | 0.529477  | -1.348227 |
| 80 | 6 | 0 | 5.569640   | 2.514799  | -2.850399 |
| 81 | 6 | 0 | 2.038743   | 3.389512  | -3.195417 |
| 82 | 6 | 0 | 7.106200   | -1.461962 | 0.032434  |
| 83 | 6 | 0 | 7.040415   | 0.508757  | -1.460019 |
| 84 | 6 | 0 | 6.914875   | 2.491594  | -2.953631 |

|     |    |   |           |           |           |
|-----|----|---|-----------|-----------|-----------|
| 85  | 1  | 0 | 4.975681  | 3.270710  | -3.370774 |
| 86  | 14 | 0 | 1.057716  | 4.652320  | -4.065229 |
| 87  | 6  | 0 | 7.796013  | -0.479365 | -0.776699 |
| 88  | 6  | 0 | 7.872818  | -2.443614 | 0.711490  |
| 89  | 6  | 0 | 7.715853  | 1.487209  | -2.263000 |
| 90  | 1  | 0 | 7.449541  | 3.224729  | -3.557954 |
| 91  | 6  | 0 | 2.199093  | 5.577979  | -5.212437 |
| 92  | 6  | 0 | 0.328827  | 5.796546  | -2.789285 |
| 93  | 6  | 0 | -0.282740 | 3.783100  | -5.022526 |
| 94  | 6  | 0 | 9.211765  | -0.474525 | -0.906585 |
| 95  | 6  | 0 | 8.530135  | -3.284285 | 1.292645  |
| 96  | 6  | 0 | 9.101212  | 1.460924  | -2.366723 |
| 97  | 1  | 0 | 1.654735  | 6.352737  | -5.772783 |
| 98  | 1  | 0 | 3.007866  | 6.072759  | -4.653206 |
| 99  | 1  | 0 | 2.661976  | 4.896910  | -5.943211 |
| 100 | 1  | 0 | -0.274857 | 6.587616  | -3.258166 |
| 101 | 1  | 0 | -0.322855 | 5.244586  | -2.092823 |
| 102 | 1  | 0 | 1.117481  | 6.281728  | -2.193256 |
| 103 | 1  | 0 | 0.144022  | 3.072679  | -5.747720 |
| 104 | 1  | 0 | -0.943274 | 3.214491  | -4.348286 |
| 105 | 1  | 0 | -0.906828 | 4.498373  | -5.578477 |
| 106 | 6  | 0 | 9.845571  | 0.475112  | -1.684559 |
| 107 | 1  | 0 | 9.793971  | -1.233997 | -0.381420 |
| 108 | 14 | 0 | 9.517689  | -4.541756 | 2.160846  |
| 109 | 1  | 0 | 9.624293  | 2.198343  | -2.973288 |
| 110 | 1  | 0 | 10.931044 | 0.472109  | -1.779080 |
| 111 | 6  | 0 | 8.981051  | -6.219259 | 1.553536  |
| 112 | 6  | 0 | 9.201968  | -4.365048 | 3.988423  |
| 113 | 6  | 0 | 11.313480 | -4.237821 | 1.766714  |
| 114 | 1  | 0 | 9.555536  | -7.022687 | 2.037945  |
| 115 | 1  | 0 | 7.914421  | -6.395059 | 1.762107  |
| 116 | 1  | 0 | 9.127006  | -6.309175 | 0.465316  |
| 117 | 1  | 0 | 9.784331  | -5.096899 | 4.567604  |
| 118 | 1  | 0 | 9.479492  | -3.358757 | 4.340428  |
| 119 | 1  | 0 | 8.137680  | -4.518906 | 4.224450  |

|     |   |   |           |           |          |
|-----|---|---|-----------|-----------|----------|
| 120 | 1 | 0 | 11.498395 | -4.309989 | 0.683624 |
| 121 | 1 | 0 | 11.626508 | -3.234561 | 2.095252 |
| 122 | 1 | 0 | 11.960562 | -4.972913 | 2.268090 |

**Table S11.** Cartesian coordinates of 6,12-TMSe 2,2'-bianthanthrenyl (dihedral angle = 120°).

SCF Done: E(RPM6) = 0.318888369959 A.U. after 26 cycles

| Center<br>Number | Atomic<br>Number | Atomic<br>Type | Coordinates (Angstroms) |           |           |
|------------------|------------------|----------------|-------------------------|-----------|-----------|
|                  |                  |                | X                       | Y         | Z         |
| 1                | 6                | 0              | 3.680721                | 2.685609  | -1.015419 |
| 2                | 6                | 0              | 5.024798                | 2.705791  | -0.898970 |
| 3                | 6                | 0              | 5.758589                | 1.626652  | -0.243681 |
| 4                | 6                | 0              | 4.997952                | 0.515739  | 0.284923  |
| 5                | 6                | 0              | 3.566858                | 0.496348  | 0.155942  |
| 6                | 6                | 0              | 2.885863                | 1.579224  | -0.492927 |
| 7                | 6                | 0              | 7.141658                | 1.646413  | -0.120056 |
| 8                | 6                | 0              | 5.654544                | -0.546927 | 0.927223  |
| 9                | 6                | 0              | 7.086168                | -0.527761 | 1.056479  |
| 10               | 6                | 0              | 7.836000                | 0.559894  | 0.537793  |
| 11               | 6                | 0              | 7.765839                | -1.607991 | 1.711230  |
| 12               | 6                | 0              | 6.970516                | -2.712283 | 2.235949  |
| 13               | 6                | 0              | 5.626549                | -2.733460 | 2.117083  |
| 14               | 6                | 0              | 4.893471                | -1.656082 | 1.458081  |
| 15               | 6                | 0              | 3.510089                | -1.675891 | 1.334807  |
| 16               | 6                | 0              | 2.815908                | -0.590237 | 0.674597  |
| 17               | 1                | 0              | 3.141933                | 3.495946  | -1.506866 |
| 18               | 1                | 0              | 5.613991                | 3.537510  | -1.293868 |
| 19               | 1                | 0              | 7.508289                | -3.521528 | 2.729958  |
| 20               | 1                | 0              | 5.036804                | -3.564123 | 2.513486  |
| 21               | 6                | 0              | 9.250422                | 0.550758  | 0.680747  |
| 22               | 6                | 0              | 9.888477                | -0.498165 | 1.313804  |
| 23               | 1                | 0              | 10.972906               | -0.497706 | 1.419485  |
| 24               | 6                | 0              | 9.149790                | -1.582871 | 1.832426  |

|    |    |   |           |           |           |
|----|----|---|-----------|-----------|-----------|
| 25 | 1  | 0 | 9.676083  | -2.397067 | 2.327395  |
| 26 | 6  | 0 | 1.503245  | 1.559920  | -0.609975 |
| 27 | 6  | 0 | 0.759147  | 0.463181  | -0.109007 |
| 28 | 6  | 0 | 1.402739  | -0.582480 | 0.534301  |
| 29 | 1  | 0 | 0.975913  | 2.379003  | -1.097977 |
| 30 | 1  | 0 | 0.823352  | -1.414112 | 0.942547  |
| 31 | 1  | 0 | 9.828213  | 1.386845  | 0.282364  |
| 32 | 6  | 0 | 2.750855  | -2.757256 | 1.850521  |
| 33 | 6  | 0 | 2.102349  | -3.684513 | 2.293367  |
| 34 | 6  | 0 | 7.902365  | 2.728225  | -0.633403 |
| 35 | 6  | 0 | 8.554648  | 3.654417  | -1.073020 |
| 36 | 14 | 0 | 1.124467  | -5.069519 | 2.956413  |
| 37 | 14 | 0 | 9.534810  | 5.039306  | -1.730229 |
| 38 | 6  | 0 | 2.309470  | -6.328006 | 3.654418  |
| 39 | 1  | 0 | 1.769998  | -7.193128 | 4.067901  |
| 40 | 1  | 0 | 2.996094  | -6.698847 | 2.878202  |
| 41 | 1  | 0 | 2.917362  | -5.893018 | 4.462481  |
| 42 | 6  | 0 | 0.132901  | -5.796275 | 1.557261  |
| 43 | 1  | 0 | -0.482643 | -6.641259 | 1.899174  |
| 44 | 1  | 0 | -0.543340 | -5.042764 | 1.121521  |
| 45 | 1  | 0 | 0.788639  | -6.159533 | 0.750442  |
| 46 | 6  | 0 | 0.006523  | -4.401480 | 4.287376  |
| 47 | 1  | 0 | 0.587907  | -3.930228 | 5.095189  |
| 48 | 1  | 0 | -0.676727 | -3.638613 | 3.880859  |
| 49 | 1  | 0 | -0.607485 | -5.197573 | 4.733732  |
| 50 | 6  | 0 | 8.968346  | 6.600328  | -0.886259 |
| 51 | 1  | 0 | 9.537516  | 7.473872  | -1.237248 |
| 52 | 1  | 0 | 7.901982  | 6.792635  | -1.080657 |
| 53 | 1  | 0 | 9.100450  | 6.528107  | 0.204912  |
| 54 | 6  | 0 | 9.242363  | 5.134048  | -3.567454 |
| 55 | 1  | 0 | 9.820858  | 5.951406  | -4.022973 |
| 56 | 1  | 0 | 9.538015  | 4.195346  | -4.062145 |
| 57 | 1  | 0 | 8.178783  | 5.308075  | -3.792134 |
| 58 | 6  | 0 | 11.329869 | 4.701495  | -1.361898 |
| 59 | 1  | 0 | 11.501411 | 4.613062  | -0.277944 |

|    |    |   |           |           |           |
|----|----|---|-----------|-----------|-----------|
| 60 | 1  | 0 | 11.660313 | 3.762599  | -1.832451 |
| 61 | 1  | 0 | 11.972557 | 5.510956  | -1.739058 |
| 62 | 6  | 0 | -0.719677 | 0.490320  | -0.206310 |
| 63 | 6  | 0 | -1.424776 | 1.602201  | 0.316584  |
| 64 | 6  | 0 | -1.409940 | -0.590912 | -0.732780 |
| 65 | 6  | 0 | -2.811474 | 1.634027  | 0.273787  |
| 66 | 1  | 0 | -0.863545 | 2.427569  | 0.753901  |
| 67 | 6  | 0 | -2.828756 | -0.586944 | -0.795502 |
| 68 | 1  | 0 | -0.863306 | -1.456110 | -1.115826 |
| 69 | 6  | 0 | -3.565007 | 2.769415  | 0.795098  |
| 70 | 6  | 0 | -3.538375 | 0.533596  | -0.290992 |
| 71 | 6  | 0 | -3.570019 | -1.696157 | -1.359072 |
| 72 | 6  | 0 | -4.913162 | 2.802103  | 0.749895  |
| 73 | 1  | 0 | -2.991641 | 3.592212  | 1.223108  |
| 74 | 6  | 0 | -4.974322 | 0.563728  | -0.339171 |
| 75 | 6  | 0 | -4.957827 | -1.663928 | -1.408295 |
| 76 | 6  | 0 | -2.851993 | -2.812196 | -1.859715 |
| 77 | 6  | 0 | -5.693093 | 1.705853  | 0.181354  |
| 78 | 1  | 0 | -5.471116 | 3.656537  | 1.141562  |
| 79 | 6  | 0 | -5.676623 | -0.520162 | -0.892148 |
| 80 | 6  | 0 | -5.737617 | -2.762662 | -1.972338 |
| 81 | 6  | 0 | -2.238838 | -3.769401 | -2.288999 |
| 82 | 6  | 0 | -7.080691 | 1.737107  | 0.133601  |
| 83 | 6  | 0 | -7.113045 | -0.489445 | -0.942211 |
| 84 | 6  | 0 | -7.085837 | -2.729679 | -2.018756 |
| 85 | 1  | 0 | -5.179499 | -3.619393 | -2.358909 |
| 86 | 14 | 0 | -1.314204 | -5.200160 | -2.930976 |
| 87 | 6  | 0 | -7.821661 | 0.630572  | -0.434613 |
| 88 | 6  | 0 | -7.800644 | 2.849889  | 0.639378  |
| 89 | 6  | 0 | -7.839270 | -1.591179 | -1.505486 |
| 90 | 1  | 0 | -7.658653 | -3.554997 | -2.442321 |
| 91 | 6  | 0 | -2.549627 | -6.475325 | -3.500682 |
| 92 | 6  | 0 | -0.258180 | -5.869463 | -1.550248 |
| 93 | 6  | 0 | -0.260810 | -4.616144 | -4.351555 |
| 94 | 6  | 0 | -9.241946 | 0.632347  | -0.498334 |

|     |    |   |            |           |           |
|-----|----|---|------------|-----------|-----------|
| 95  | 6  | 0 | -8.418018  | 3.802729  | 1.072331  |
| 96  | 6  | 0 | -9.227554  | -1.554413 | -1.551084 |
| 97  | 1  | 0 | -2.043289  | -7.367600 | -3.898094 |
| 98  | 1  | 0 | -3.197822  | -6.797387 | -2.671211 |
| 99  | 1  | 0 | -3.195001  | -6.072572 | -4.296407 |
| 100 | 1  | 0 | 0.327445   | -6.740112 | -1.880080 |
| 101 | 1  | 0 | 0.449927   | -5.104800 | -1.190506 |
| 102 | 1  | 0 | -0.874236  | -6.181130 | -0.691959 |
| 103 | 1  | 0 | -0.878641  | -4.176500 | -5.150192 |
| 104 | 1  | 0 | 0.453277   | -3.844612 | -4.020719 |
| 105 | 1  | 0 | 0.317837   | -5.442891 | -4.789363 |
| 106 | 6  | 0 | -9.925040  | -0.437109 | -1.044798 |
| 107 | 1  | 0 | -9.788079  | 1.493215  | -0.108198 |
| 108 | 14 | 0 | -9.345977  | 5.227640  | 1.719583  |
| 109 | 1  | 0 | -9.788990  | -2.384656 | -1.976437 |
| 110 | 1  | 0 | -11.013671 | -0.428138 | -1.090036 |
| 111 | 6  | 0 | -8.814267  | 6.742005  | 0.773455  |
| 112 | 6  | 0 | -8.947818  | 5.402679  | 3.531163  |
| 113 | 6  | 0 | -11.162341 | 4.894269  | 1.469818  |
| 114 | 1  | 0 | -9.354175  | 7.637329  | 1.115610  |
| 115 | 1  | 0 | -7.736708  | 6.930509  | 0.897813  |
| 116 | 1  | 0 | -9.009453  | 6.621668  | -0.304100 |
| 117 | 1  | 0 | -9.491709  | 6.246668  | 3.980674  |
| 118 | 1  | 0 | -9.223281  | 4.490878  | 4.084738  |
| 119 | 1  | 0 | -7.871506  | 5.574494  | 3.686794  |
| 120 | 1  | 0 | -11.396615 | 4.758680  | 0.402429  |
| 121 | 1  | 0 | -11.473958 | 3.981509  | 2.001169  |
| 122 | 1  | 0 | -11.774812 | 5.727518  | 1.845345  |

---

**Table S12.** Cartesian coordinates of 6,12-TMSe 2,2'-bianthanthrenyl (dihedral angle = 180°).

SCF Done: E(RPM6) = 0.327651880601 A.U. after 8 cycles

| Center<br>Number | Atomic<br>Number | Atomic<br>Type | Coordinates (Angstroms) |           |           |
|------------------|------------------|----------------|-------------------------|-----------|-----------|
|                  |                  |                | X                       | Y         | Z         |
| 1                | 6                | 0              | -3.628776               | 2.934347  | 0.320428  |
| 2                | 6                | 0              | -4.977965               | 2.942847  | 0.290283  |
| 3                | 6                | 0              | -5.753633               | 1.718568  | 0.110972  |
| 4                | 6                | 0              | -5.027119               | 0.482795  | -0.077045 |
| 5                | 6                | 0              | -3.592360               | 0.474475  | -0.016531 |
| 6                | 6                | 0              | -2.871348               | 1.692814  | 0.199969  |
| 7                | 6                | 0              | -7.142441               | 1.715596  | 0.110825  |
| 8                | 6                | 0              | -5.719032               | -0.716098 | -0.311599 |
| 9                | 6                | 0              | -7.155850               | -0.718293 | -0.327513 |
| 10               | 6                | 0              | -7.874252               | 0.484522  | -0.100796 |
| 11               | 6                | 0              | -7.871235               | -1.935746 | -0.579013 |
| 12               | 6                | 0              | -7.104681               | -3.146831 | -0.849188 |
| 13               | 6                | 0              | -5.755157               | -3.142132 | -0.859420 |
| 14               | 6                | 0              | -4.985695               | -1.934038 | -0.575239 |
| 15               | 6                | 0              | -3.595545               | -1.927670 | -0.568831 |
| 16               | 6                | 0              | -2.870042               | -0.735728 | -0.179782 |
| 17               | 1                | 0              | -3.058990               | 3.854685  | 0.446888  |
| 18               | 1                | 0              | -5.540124               | 3.874122  | 0.396081  |
| 19               | 1                | 0              | -7.669123               | -4.057854 | -1.047968 |
| 20               | 1                | 0              | -5.188455               | -4.052236 | -1.072142 |
| 21               | 6                | 0              | -9.295392               | 0.445531  | -0.099973 |
| 22               | 6                | 0              | -9.968512               | -0.739243 | -0.326469 |
| 23               | 1                | 0              | -11.057851              | -0.761155 | -0.321548 |
| 24               | 6                | 0              | -9.260554               | -1.935076 | -0.571745 |
| 25               | 1                | 0              | -9.814914               | -2.853373 | -0.756627 |
| 26               | 6                | 0              | -1.488649               | 1.668261  | 0.297293  |
| 27               | 6                | 0              | -0.772407               | 0.441112  | 0.295122  |
| 28               | 6                | 0              | -1.466393               | -0.735560 | 0.029006  |
| 29               | 1                | 0              | -0.940677               | 2.604388  | 0.427372  |

|    |    |   |            |           |           |
|----|----|---|------------|-----------|-----------|
| 30 | 1  | 0 | -0.934526  | -1.689218 | -0.033312 |
| 31 | 1  | 0 | -9.850029  | 1.367904  | 0.081480  |
| 32 | 6  | 0 | -2.879660  | -3.048030 | -1.061217 |
| 33 | 6  | 0 | -2.313519  | -3.979135 | -1.599429 |
| 34 | 6  | 0 | -7.871844  | 2.915268  | 0.312253  |
| 35 | 6  | 0 | -8.497148  | 3.942514  | 0.485516  |
| 36 | 14 | 0 | -1.559264  | -5.309686 | -2.587521 |
| 37 | 14 | 0 | -9.437443  | 5.478251  | 0.744858  |
| 38 | 6  | 0 | -2.944336  | -6.403350 | -3.190567 |
| 39 | 1  | 0 | -2.557326  | -7.217825 | -3.820737 |
| 40 | 1  | 0 | -3.489134  | -6.857674 | -2.349663 |
| 41 | 1  | 0 | -3.667390  | -5.829147 | -3.790163 |
| 42 | 6  | 0 | -0.365769  | -6.278700 | -1.541333 |
| 43 | 1  | 0 | 0.139575   | -7.058410 | -2.129927 |
| 44 | 1  | 0 | 0.411161   | -5.617256 | -1.122142 |
| 45 | 1  | 0 | -0.882112  | -6.768832 | -0.701311 |
| 46 | 6  | 0 | -0.679388  | -4.504421 | -4.017722 |
| 47 | 1  | 0 | -1.372724  | -3.895867 | -4.619261 |
| 48 | 1  | 0 | 0.122225   | -3.837831 | -3.660715 |
| 49 | 1  | 0 | -0.222948  | -5.251867 | -4.682808 |
| 50 | 6  | 0 | -8.967766  | 6.677716  | -0.600628 |
| 51 | 1  | 0 | -9.517844  | 7.625116  | -0.501387 |
| 52 | 1  | 0 | -7.891759  | 6.908044  | -0.570270 |
| 53 | 1  | 0 | -9.191488  | 6.260686  | -1.595194 |
| 54 | 6  | 0 | -8.990440  | 6.153642  | 2.422121  |
| 55 | 1  | 0 | -9.539141  | 7.082029  | 2.638851  |
| 56 | 1  | 0 | -9.229712  | 5.427706  | 3.215179  |
| 57 | 1  | 0 | -7.914062  | 6.375182  | 2.487427  |
| 58 | 6  | 0 | -11.252277 | 5.064828  | 0.659433  |
| 59 | 1  | 0 | -11.514190 | 4.634349  | -0.319404 |
| 60 | 1  | 0 | -11.528065 | 4.332281  | 1.433569  |
| 61 | 1  | 0 | -11.872033 | 5.961376  | 0.809059  |
| 62 | 6  | 0 | 0.705863   | 0.452762  | 0.426395  |
| 63 | 6  | 0 | 1.396993   | 1.695521  | 0.397818  |
| 64 | 6  | 0 | 1.447821   | -0.723212 | 0.429228  |



|    |    |   |          |           |           |
|----|----|---|----------|-----------|-----------|
| 65 | 6  | 0 | 2.778687 | 1.747898  | 0.305459  |
| 66 | 1  | 0 | 0.822352 | 2.624367  | 0.420001  |
| 67 | 6  | 0 | 2.866890 | -0.703743 | 0.460108  |
| 68 | 1  | 0 | 0.944443 | -1.694218 | 0.444698  |
| 69 | 6  | 0 | 3.493845 | 3.014007  | 0.179924  |
| 70 | 6  | 0 | 3.541619 | 0.535059  | 0.314182  |
| 71 | 6  | 0 | 3.654442 | -1.905839 | 0.639101  |
| 72 | 6  | 0 | 4.833958 | 3.055088  | 0.026431  |
| 73 | 1  | 0 | 2.898434 | 3.926427  | 0.206504  |
| 74 | 6  | 0 | 4.970230 | 0.575435  | 0.176372  |
| 75 | 6  | 0 | 5.032499 | -1.876084 | 0.457483  |
| 76 | 6  | 0 | 3.027211 | -3.078174 | 1.131862  |
| 77 | 6  | 0 | 5.645642 | 1.841259  | -0.002809 |
| 78 | 1  | 0 | 5.362024 | 4.006172  | -0.079079 |
| 79 | 6  | 0 | 5.704690 | -0.620902 | 0.206474  |
| 80 | 6  | 0 | 5.850874 | -3.083226 | 0.527908  |
| 81 | 6  | 0 | 2.549415 | -4.056822 | 1.671639  |
| 82 | 6  | 0 | 7.020979 | 1.874719  | -0.191601 |
| 83 | 6  | 0 | 7.130068 | -0.586547 | 0.026980  |
| 84 | 6  | 0 | 7.186252 | -3.051243 | 0.335011  |
| 85 | 1  | 0 | 5.331686 | -4.022606 | 0.734337  |
| 86 | 14 | 0 | 1.956067 | -5.456580 | 2.674029  |
| 87 | 6  | 0 | 7.792993 | 0.649751  | -0.188421 |
| 88 | 6  | 0 | 7.698190 | 3.105624  | -0.386770 |
| 89 | 6  | 0 | 7.890652 | -1.801628 | 0.071300  |
| 90 | 1  | 0 | 7.785910 | -3.960591 | 0.374715  |
| 91 | 6  | 0 | 3.395067 | -6.619252 | 2.910167  |
| 92 | 6  | 0 | 0.550905 | -6.320402 | 1.814943  |
| 93 | 6  | 0 | 1.395558 | -4.755651 | 4.306357  |
| 94 | 6  | 0 | 9.200901 | 0.648578  | -0.384515 |
| 95 | 6  | 0 | 8.278655 | 4.159721  | -0.554680 |
| 96 | 6  | 0 | 9.265887 | -1.763602 | -0.123577 |
| 97 | 1  | 0 | 3.105518 | -7.484039 | 3.525522  |
| 98 | 1  | 0 | 3.763368 | -6.999970 | 1.945931  |
| 99 | 1  | 0 | 4.232270 | -6.112891 | 3.414763  |

|     |    |   |           |           |           |
|-----|----|---|-----------|-----------|-----------|
| 100 | 1  | 0 | 0.085878  | -7.070578 | 2.471781  |
| 101 | 1  | 0 | -0.232171 | -5.603341 | 1.518225  |
| 102 | 1  | 0 | 0.898292  | -6.836695 | 0.906433  |
| 103 | 1  | 0 | 2.208483  | -4.201276 | 4.800986  |
| 104 | 1  | 0 | 0.555516  | -4.056706 | 4.165344  |
| 105 | 1  | 0 | 1.062110  | -5.547955 | 4.992119  |
| 106 | 6  | 0 | 9.916017  | -0.533074 | -0.356017 |
| 107 | 1  | 0 | 9.712092  | 1.597331  | -0.557447 |
| 108 | 14 | 0 | 9.151742  | 5.735870  | -0.806889 |
| 109 | 1  | 0 | 9.853575  | -2.679408 | -0.096834 |
| 110 | 1  | 0 | 10.994646 | -0.525522 | -0.509889 |
| 111 | 6  | 0 | 8.852653  | 6.807632  | 0.686913  |
| 112 | 6  | 0 | 8.469511  | 6.534924  | -2.344788 |
| 113 | 6  | 0 | 10.967123 | 5.364639  | -1.002798 |
| 114 | 1  | 0 | 9.369561  | 7.774283  | 0.595171  |
| 115 | 1  | 0 | 7.779264  | 7.011021  | 0.821993  |
| 116 | 1  | 0 | 9.216737  | 6.316384  | 1.603008  |
| 117 | 1  | 0 | 8.969806  | 7.491921  | -2.554123 |
| 118 | 1  | 0 | 8.608440  | 5.883074  | -3.221707 |
| 119 | 1  | 0 | 7.391220  | 6.733078  | -2.244923 |
| 120 | 1  | 0 | 11.367054 | 4.862754  | -0.108269 |
| 121 | 1  | 0 | 11.145210 | 4.705259  | -1.866211 |
| 122 | 1  | 0 | 11.547095 | 6.286408  | -1.158616 |

-----

### Atropisomerism of 6,12-hexyl [4]CA<sub>2,8</sub>

Atropisomerism of 6,12-hexyl [4]CA<sub>2,8</sub> was analyzed by the same method for 6,12-hexyl [4]CC<sub>2,8</sub>.<sup>13</sup> Thus, a toluene solution of 6,12-hexyl (*P*)-(12,8)-[4]CA<sub>2,8</sub> in a sealed tube under dark conditions was heated at 120, 140, 160 and 180 °C, respectively (Fig. S5). The profile of the second (11,9)-isomer indicated one-by-one rotation of the anthanthrenylene panel (Fig. S6). The first-order decay constant of 6,12-hexyl (*P*)-(12,8)-[4]CA<sub>2,8</sub> was analyzed by Eyring plot (Fig. S7)<sup>14,15</sup> to give the approximate line with high degree of confidence. The activation enthalpy  $\Delta H^\ddagger$

13. Hitosugi, S.; Nakanishi, W.; Isobe, H. *Chem. Asian J.* **2012**, *7*, 1550-1552.

14. Eyring, H. *Chem. Rev.* **1935**, *17*, 65-77.

was +21 kcal/mol, and the activation entropy  $\Delta S^\ddagger$  was  $-15$  cal/mol·K.

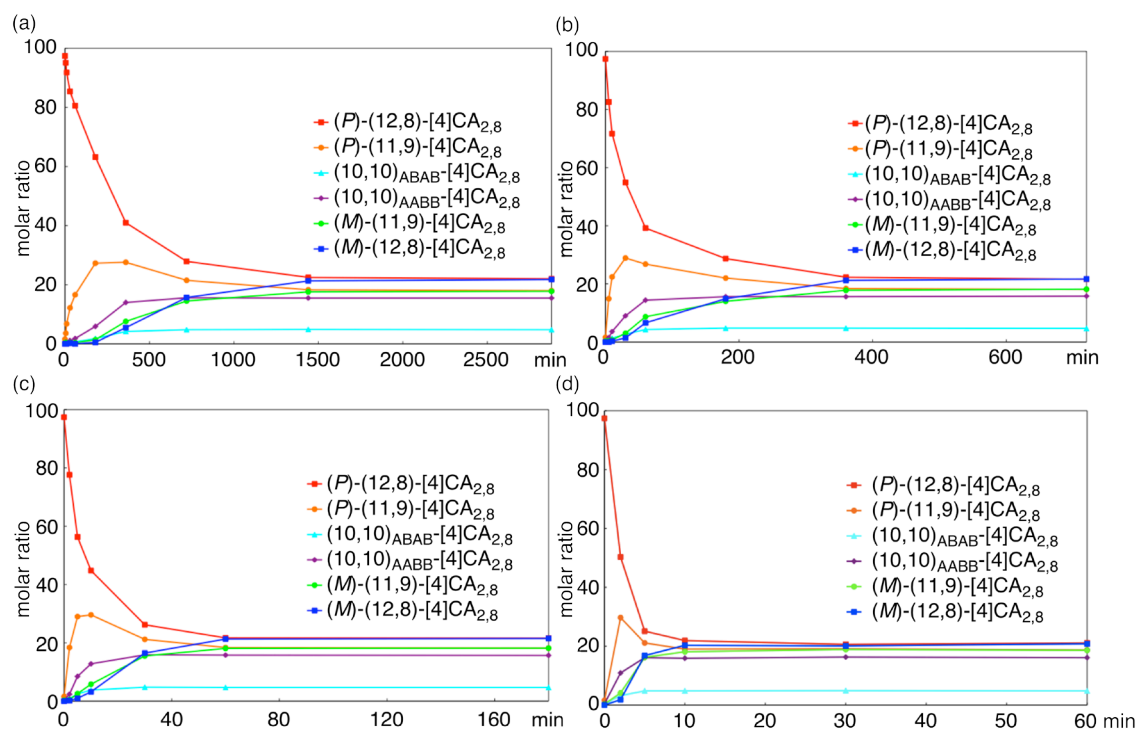

**Fig. S5.** Time-course analysis of isomerization of 6,12-hexyl  $(P)$ -(12,8)-[4]CA<sub>2,8</sub> in toluene at 120 °C (a), 140 °C (b), 160 °C (c) and 180 °C (d).

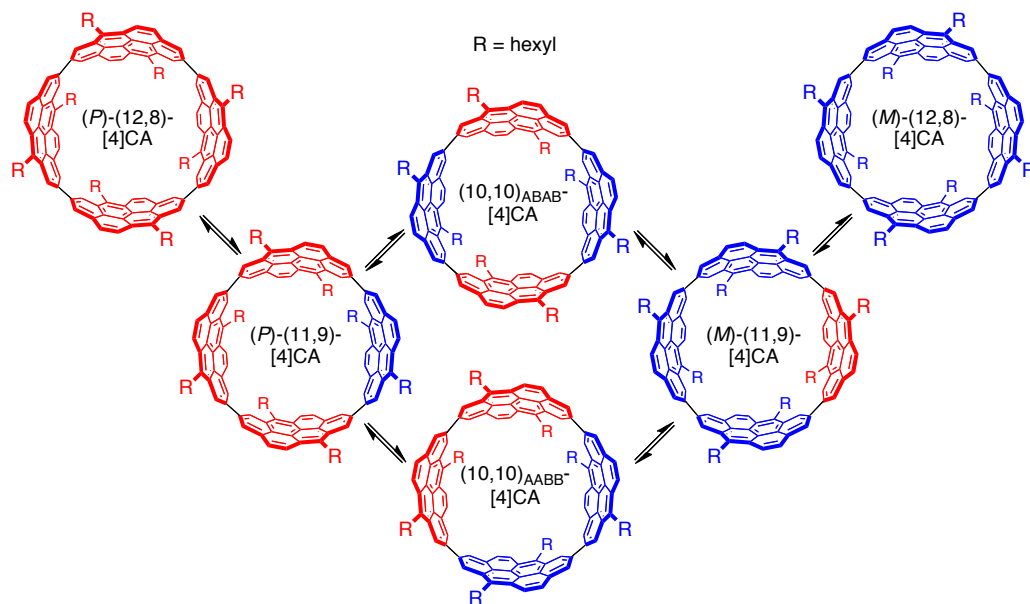

**Fig. S6.** Isomerization path of 6,12-hexyl [4]CA<sub>2,8</sub>.

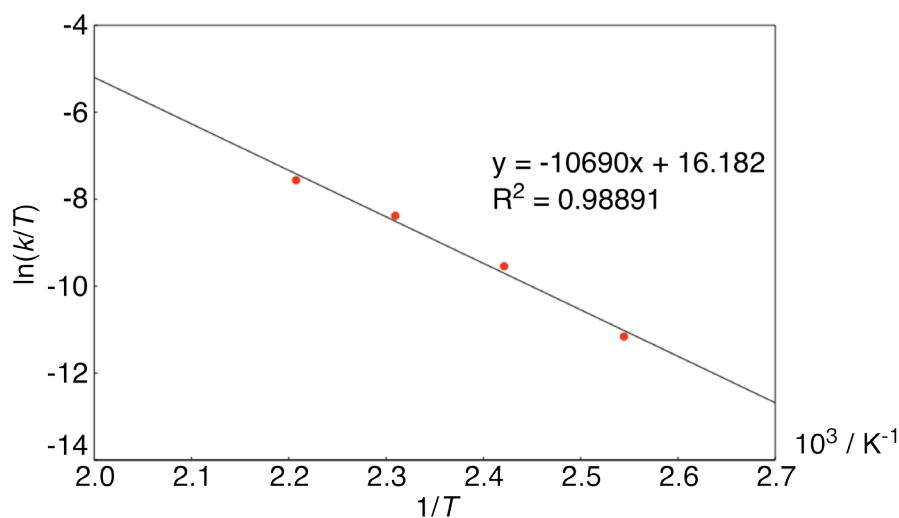

**Fig. S7.** Eyring plot of the first-order decay rate of 6,12-hexyl (*P*)-(12,8)-[4]CA<sub>2,8</sub>.

### X-ray crystallographic analysis of 6,12-TIPSe [4]CA<sub>2,8</sub>

A single crystal (ca.  $0.10 \times 0.02 \times 0.02 \text{ mm}^3$ ) suitable for X-ray analysis was obtained from toluene solution of racemic 6,12-TIPSe [4]CA<sub>2,8</sub> after diffusing vaporous hexane over 5 days. The structure was solved by SHELXS-97 and refined by SHELXL-97<sup>16</sup> through Yadokari-XG 2009 application.<sup>17</sup> Due to the insufficient data, the structures are refined with isotropic thermal factors on carbon atoms. Hydrogen atoms were included in calculated positions. The residual scattered electron densities, originating from disordered solvents in the tube void, were eliminated by the SQUEEZE protocol equipped in PLATON.<sup>18</sup> Several errors were found in CheckCIF routine of IUCR mostly because of the insufficient quality of the crystal, and, due to the insufficient data, the crystal data were used only for the discussion of overall molecular structures and packing motifs. Crystallographic data were deposited in the Cambridge Crystallographic Data Centre (CCDC 927603). The data can be obtained free of charge from The Cambridge Crystallographic Data Centre via [www.ccdc.cam.ac.uk/data\\_request/cif](http://www.ccdc.cam.ac.uk/data_request/cif). Crystal data and structure refinement are listed in Table S13. Representative intermolecular contacts are shown in Fig. S8.

16. Sheldrick, G. M. *Acta Crystallogr. A* **2008**, *64*, 112-122.

17. Kabuto, C.; Akine, S.; Nemoto, T.; Kwon, E. *J. Cryst. Soc. Jpn.* **2009**, *51*, 218-224.

18. Spek, A. L. *J. Appl. Cryst.* **2003**, *36*, 7-13.

**Table S13.** Crystal data and structure refinement for 6,12-TIPSe [4]CA<sub>2,8</sub> (CCDC927603).

|                                 |                                                                                                                        |
|---------------------------------|------------------------------------------------------------------------------------------------------------------------|
| Empirical formula               | C <sub>200</sub> H <sub>256</sub> Si <sub>8</sub>                                                                      |
| Formula weight                  | 2884.77                                                                                                                |
| Temperature                     | 100 K                                                                                                                  |
| Wavelength                      | 0.71073 Å                                                                                                              |
| Crystal system                  | Monoclinic                                                                                                             |
| Space group                     | P2/n                                                                                                                   |
| Unit cell dimensions            | $a = 16.179(7)$ Å $a = 90^\circ$ .<br>$b = 17.461(8)$ Å $b = 95.835(6)^\circ$ .<br>$c = 32.012(15)$ Å $g = 90^\circ$ . |
| Volume                          | 8997(7) Å <sup>3</sup>                                                                                                 |
| Z                               | 2                                                                                                                      |
| Density (calculated)            | 1.065 Mg/m <sup>3</sup>                                                                                                |
| Absorption coefficient          | 0.110 mm <sup>-1</sup>                                                                                                 |
| F(000)                          | 3136.0                                                                                                                 |
| Crystal size                    | 0.10 x 0.02 x 0.02 mm <sup>3</sup>                                                                                     |
| Theta range for data collection | 2.20 to 16.00°.                                                                                                        |
| Index ranges                    | -12 ≤ h ≤ 12, -13 ≤ k ≤ 13, -24 ≤ l ≤ 24                                                                               |
| Reflections collected           | 29996                                                                                                                  |
| Independent reflections         | 4437 [R(int) = 0.0863]                                                                                                 |
| Completeness to theta = 25.00°  | 99.4 %                                                                                                                 |
| Absorption correction           | Empirical                                                                                                              |
| Max. and min. transmission      | 0.9978 and 0.9891                                                                                                      |
| Refinement method               | Full-matrix least-squares on $F^2$                                                                                     |
| Data / restraints / parameters  | 4437 / 0 / 433                                                                                                         |
| Goodness-of-fit on $F^2$        | 1.929                                                                                                                  |
| Final R indices [I > 2σ(I)]     | R1 = 0.1535, wR2 = 0.4279                                                                                              |
| R indices (all data)            | R1 = 0.1715, wR2 = 0.4429                                                                                              |
| Largest diff. peak and hole     | 1.132 and -0.899 e.Å <sup>-3</sup>                                                                                     |

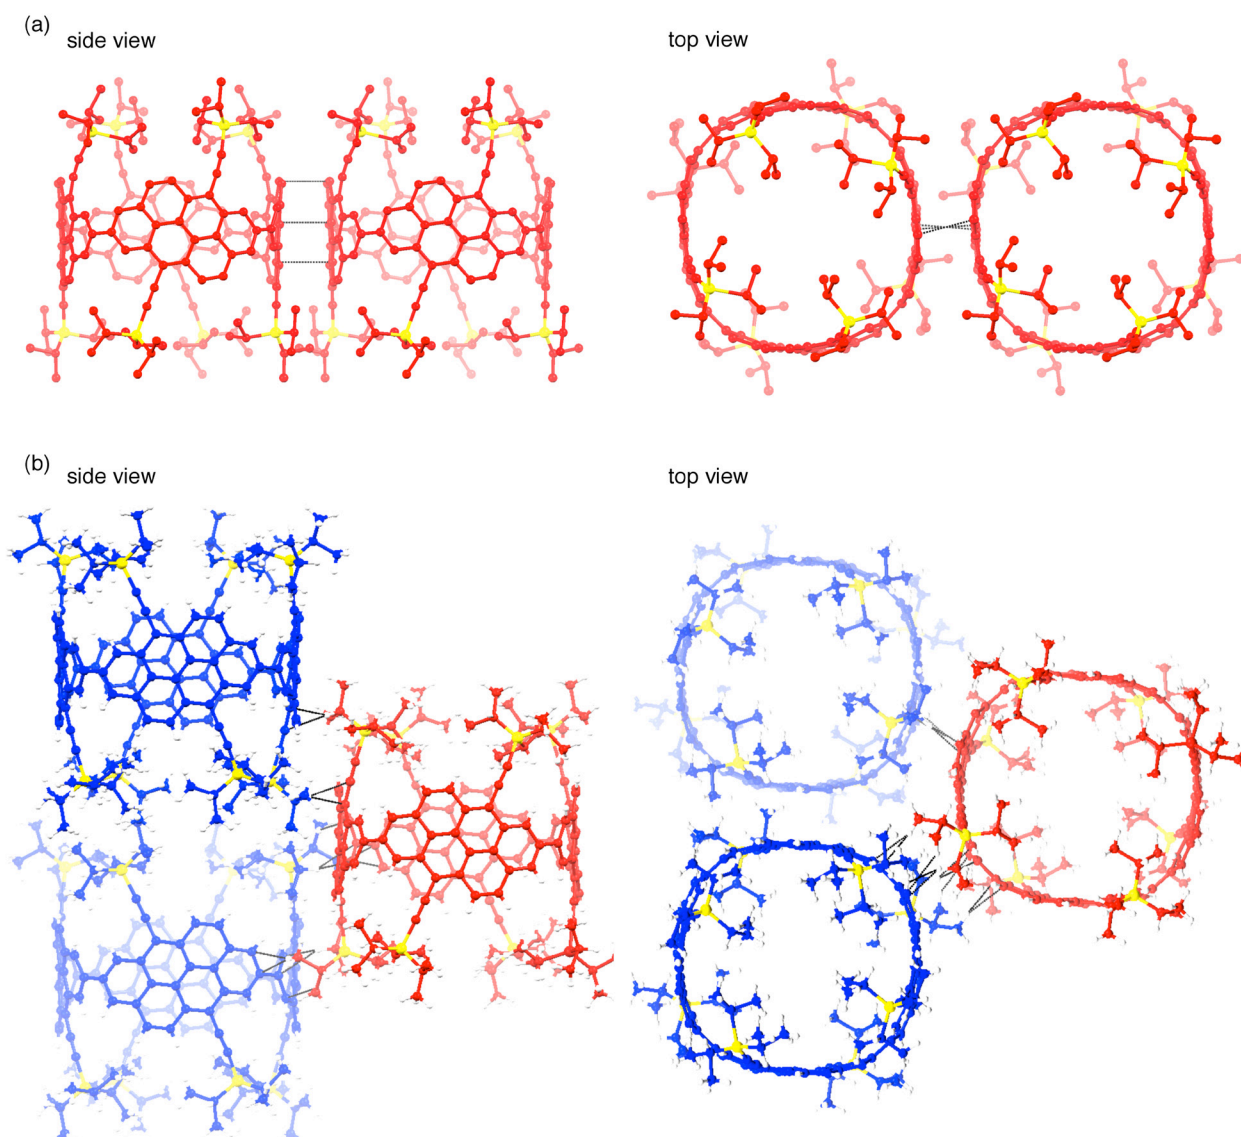

**Fig. S8.** Inter-columnar short contacts of (12,8)-[4]CA<sub>2,8</sub>. Atomic distances within the sum of van der Waals radii are automatically selected by Mercury CSD. (a) Inter-columnar contacts between two (*P*)-isomers in the homohelical layer. The short contacts between sp<sup>2</sup>-carbons on the wall are observed at 3.36(1), 3.257(19) and 3.24(1) Å. Hydrogen atoms are omitted for clarity. (b) Inter-columnar contacts between (*P*)- and (*M*)-isomers in heterohelical layers. The short contacts between isopropyl-H and sp<sup>2</sup>-carbons on the wall are observed at 2.762(14), 2.724(13), 2.896(14), 2.733(13), 2.891(13), 2.822(12) and 2.881(12) Å.
